# Supplementary material for: A large-scale zebrafish gene knockout resource for the genome-wide study of gene function
Source: HighWire-hosted journal article supplement (doi:10.1101/gr.151464.112), 2013-02-04
Supplement: Supplemental_Table_1.xlsx [file Supplemental_Table_1.xlsx]

## Sheet: Supplementary_Table_1.txt
Chromosome	Ensembl Transcript ID	Ensembl Gene ID	Gene Sysmbol	Integration position	Intron/Exon number
chr11	ENSDART00000130636	ENSDARG00000087774	Metazoa_SRP	exon	1
chr11	ENSDART00000125239	ENSDARG00000086674	Metazoa_SRP	exon	1
chr11	ENSDART00000126476	ENSDARG00000087739	Metazoa_SRP	exon	1
chr11	ENSDART00000129868	ENSDARG00000087770	Metazoa_SRP	exon	1
chr11	ENSDART00000129039	ENSDARG00000089759	Metazoa_SRP	exon	1
chr11	ENSDART00000123122	ENSDARG00000091091	Metazoa_SRP	exon	1
chr11	ENSDART00000066191	ENSDARG00000045025	ift52	exon	1
chr11	ENSDART00000104111	ENSDARG00000044925	CDK5RAP1	exon	1
chr11	ENSDART00000080116	ENSDARG00000070606	ikbke	exon	1
chr11	ENSDART00000005616	ENSDARG00000012506	rnpep	exon	1
chr11	ENSDART00000103549	ENSDARG00000008034	skib	exon	1
chr11	ENSDART00000023889	ENSDARG00000007407	barx1	exon	1
chr11	ENSDART00000045942	ENSDARG00000018691	phf2	exon	1
chr11	ENSDART00000122424	ENSDARG00000089507	ugt1b4	exon	1
chr11	ENSDART00000127075	ENSDARG00000089507	ugt1b4	exon	1
chr11	ENSDART00000127355	ENSDARG00000086881	IER2	exon	1
chr11	ENSDART00000129918	ENSDARG00000055238	kif17	exon	1
chr11	ENSDART00000110622	ENSDARG00000076532	PTMS	exon	1
chr11	ENSDART00000065585	ENSDARG00000044634	tbce	exon	1
chr11	ENSDART00000116945	ENSDARG00000083266	SNORD12	exon	1
chr21	ENSDART00000067001	ENSDARG00000045565	noc4l	exon	1
chr21	ENSDART00000137491	ENSDARG00000094859	si:dkey-11o15.10	exon	1
chr21	ENSDART00000137307	ENSDARG00000044691	ppp1r3b	exon	1
chr21	ENSDART00000137307	ENSDARG00000044691	ppp1r3b	exon	1
chr21	ENSDART00000016916	ENSDARG00000059368	gria4b	exon	1
chr21	ENSDART00000034788	ENSDARG00000044842	zgc:113348	exon	1
chr21	ENSDART00000009889	ENSDARG00000054929	zgc:110540	exon	1
chr21	ENSDART00000134617	ENSDARG00000012399	adssl	exon	1
chr21	ENSDART00000130157	ENSDARG00000090676	ODZ2 (1 of 3)	exon	1
chr21	ENSDART00000131651	ENSDARG00000073961	CYSTM1	exon	1
chr21	ENSDART00000135659	ENSDARG00000012932	MAT2B	exon	1
chr21	ENSDART00000076031	ENSDARG00000017813	PIGS	exon	1
chr21	ENSDART00000139813	ENSDARG00000077950	si:ch73-178d14.1	exon	1
chr21	ENSDART00000099535	ENSDARG00000019707	C21H9orf114	exon	1
chr7	ENSDART00000142619	ENSDARG00000094877	CR339057.1	exon	1
chr7	ENSDART00000103361	ENSDARG00000025868	zdhhc13	exon	1
chr7	ENSDART00000101601	ENSDARG00000057328	cth1	exon	1
chr7	ENSDART00000054998	ENSDARG00000006754	mllt3	exon	1
chr7	ENSDART00000077545	ENSDARG00000055226	slc7a7	exon	1
chr7	ENSDART00000127669	ENSDARG00000088810	prox1b	exon	1
chr7	ENSDART00000012450	ENSDARG00000056184	dvl2	exon	1
chr7	ENSDART00000088041	ENSDARG00000061610	UFSP1	exon	1
chr7	ENSDART00000048921	ENSDARG00000006545	rgp1	exon	1
chr7	ENSDART00000079245	ENSDARG00000056722	cd99l2	exon	1
chr7	ENSDART00000101120	ENSDARG00000015161	zgc:92664	exon	1
chr7	ENSDART00000139380	ENSDARG00000095441	BX927082.3	exon	1
chr7	ENSDART00000113467	ENSDARG00000076919	igdcc4	exon	1
chr7	ENSDART00000143514	ENSDARG00000006487	anp32a	exon	1
chr7	ENSDART00000109872	ENSDARG00000077584	cln6a	exon	1
chr7	ENSDART00000148805	ENSDARG00000010756	nod2	exon	1
chr7	ENSDART00000143815	ENSDARG00000005315	celf1	exon	1
chr7	ENSDART00000099046	ENSDARG00000036489	MAF1 (2 of 2)	exon	1
chr7	ENSDART00000053009	ENSDARG00000036489	MAF1 (2 of 2)	exon	1
chr7	ENSDART00000005127	ENSDARG00000017242	FAM59A	exon	1
chr7	ENSDART00000098976	ENSDARG00000068432	wu:fb17g07	exon	1
chr7	ENSDART00000098928	ENSDARG00000068410	zgc:162297	exon	1
chr7	ENSDART00000008328	ENSDARG00000052065	IRS4 (1 of 2)	exon	1
chr7	ENSDART00000055956	ENSDARG00000038359	enosf1	exon	1
chr7	ENSDART00000081359	ENSDARG00000058479	zgc:110425	exon	1
chr7	ENSDART00000128678	ENSDARG00000088999	METTL4	exon	1
chr7	ENSDART00000114942	ENSDARG00000074491	HIST1H2BM (6 of 7)	exon	1
chr17	ENSDART00000149366	ENSDARG00000043865	timm9	exon	1
chr17	ENSDART00000064412	ENSDARG00000043873	arid4a	exon	1
chr17	ENSDART00000146786	ENSDARG00000028581	jkamp	exon	1
chr17	ENSDART00000066604	ENSDARG00000045289	gpr137c	exon	1
chr17	ENSDART00000104999	ENSDARG00000005232	ccdc85ca	exon	1
chr17	ENSDART00000136727	ENSDARG00000056491	ikzf5	exon	1
chr17	ENSDART00000135814	ENSDARG00000008192	pank1a	exon	1
chr17	ENSDART00000079600	ENSDARG00000057058	minpp1a	exon	1
chr17	ENSDART00000082193	ENSDARG00000044090	zmpste24	exon	1
chr17	ENSDART00000143542	ENSDARG00000094258	commd9	exon	1
chr17	ENSDART00000141327	ENSDARG00000059131	spdya	exon	1
chr17	ENSDART00000076276	ENSDARG00000054128	im:7136021	exon	1
chr17	ENSDART00000077307	ENSDARG00000055027	pomt2	exon	1
chr17	ENSDART00000077307	ENSDARG00000055027	pomt2	exon	1
chr17	ENSDART00000145487	ENSDARG00000013794	klf11b	exon	1
chr17	ENSDART00000103830	ENSDARG00000070590	NT5C1A (1 of 2)	exon	1
chr17	ENSDART00000075150	ENSDARG00000019995	bmp4	exon	1
chr17	ENSDART00000105117	ENSDARG00000071203	sptssa	exon	1
chr2	ENSDART00000081094	ENSDARG00000058267	glmna	exon	1
chr2	ENSDART00000145108	ENSDARG00000039203	MFF (2 of 2)	exon	1
chr2	ENSDART00000099702	ENSDARG00000061908	mfsd12a	exon	1
chr2	ENSDART00000109849	ENSDARG00000076228	kif2c	exon	1
chr2	ENSDART00000003670	ENSDARG00000038694	zgc:101744	exon	1
chr2	ENSDART00000136610	ENSDARG00000079134	mettl17	exon	1
chr2	ENSDART00000143203	ENSDARG00000079202	parp2	exon	1
chr2	ENSDART00000133007	ENSDARG00000019541	gpt2l	exon	1
chr2	ENSDART00000114162	ENSDARG00000079412	ftr02	exon	1
chr2	ENSDART00000084223	ENSDARG00000060054	EPC1 (1 of 2)	exon	1
chr2	ENSDART00000140555	ENSDARG00000092961	ftr26	exon	1
chr2	ENSDART00000127623	ENSDARG00000019239	cul1a	exon	1
chr2	ENSDART00000100924	ENSDARG00000003382	cwc25	exon	1
chr2	ENSDART00000146360	ENSDARG00000008966	tbl1xr1	exon	1
chr2	ENSDART00000138136	ENSDARG00000075007	CHST2 (2 of 2)	exon	1
chr2	ENSDART00000138223	ENSDARG00000058638	si:ch211-71m22.1	exon	1
chr22	ENSDART00000141469	ENSDARG00000031954	rbck1	exon	1
chr22	ENSDART00000139297	ENSDARG00000071570	CCDC71	exon	1
chr22	ENSDART00000064772	ENSDARG00000044114	cyb561d2	exon	1
chr22	ENSDART00000131396	ENSDARG00000094563	si:dkey-4c15.6	exon	1
chr22	ENSDART00000058662	ENSDARG00000040109	dbt	exon	1
chr22	ENSDART00000148641	ENSDARG00000095945	trmt13	exon	1
chr22	ENSDART00000062727	ENSDARG00000042742	stx6	exon	1
chr22	ENSDART00000014330	ENSDARG00000009881	ier5	exon	1
chr22	ENSDART00000135604	ENSDARG00000062402	frem1b	exon	1
chr22	ENSDART00000134798	ENSDARG00000071450	tdrd5	exon	1
chr22	ENSDART00000137985	ENSDARG00000006192	gatad2ab	exon	1
chr22	ENSDART00000131234	ENSDARG00000092246	si:dkey-20i20.3	exon	1
chr22	ENSDART00000133982	ENSDARG00000056483	ssbp4	exon	1
chr22	ENSDART00000060978	ENSDARG00000041600	wdr83	exon	1
chr22	ENSDART00000142165	ENSDARG00000092128	si:dkey-1b17.2	exon	1
chr22	ENSDART00000146471	ENSDARG00000077862	si:dkey-169i5.4	exon	1
chr22	ENSDART00000113725	ENSDARG00000078779	si:ch73-253j10.1	exon	1
chr22	ENSDART00000137548	ENSDARG00000022372	kng1	exon	1
chr22	ENSDART00000143792	ENSDARG00000004502	rcor3	exon	1
chr22	ENSDART00000081969	ENSDARG00000058984	zgc:123349	exon	1
chr22	ENSDART00000001201	ENSDARG00000001057	bysl	exon	1
chr22	ENSDART00000145983	ENSDARG00000076554	cdkn1a	exon	1
chr22	ENSDART00000145983	ENSDARG00000076554	cdkn1a	exon	1
chr22	ENSDART00000149652	ENSDARG00000095907	si:ch211-274k16.6	exon	1
chr22	ENSDART00000148874	ENSDARG00000095872	si:ch211-209l18.5	exon	1
chr22	ENSDART00000140146	ENSDARG00000077263	si:ch73-27e22.3	exon	1
chr22	ENSDART00000148134	ENSDARG00000092266	si:ch73-27e22.2	exon	1
chr22	ENSDART00000105939	ENSDARG00000079762	si:dkey-253d23.4	exon	1
chr1	ENSDART00000130697	ENSDARG00000087646	RUNX1	exon	1
chr1	ENSDART00000033361	ENSDARG00000007678	ttyh3b	exon	1
chr1	ENSDART00000123431	ENSDARG00000089930	iqce	exon	1
chr1	ENSDART00000103412	ENSDARG00000070460	grk4	exon	1
chr1	ENSDART00000047728	ENSDARG00000030759	melk	exon	1
chr1	ENSDART00000054228	ENSDARG00000037278	lrata	exon	1
chr1	ENSDART00000008469	ENSDARG00000017174	dlx2b	exon	1
chr1	ENSDART00000044214	ENSDARG00000029751	wbp1lb	exon	1
chr1	ENSDART00000065125	ENSDARG00000058231	nt5c2b	exon	1
chr1	ENSDART00000052423	ENSDARG00000078308	spry2	exon	1
chr1	ENSDART00000146310	ENSDARG00000078016	DTX4 (2 of 2)	exon	1
chr1	ENSDART00000146310	ENSDARG00000078016	DTX4 (2 of 2)	exon	1
chr1	ENSDART00000053157	ENSDARG00000036592	setd4	exon	1
chr1	ENSDART00000143474	ENSDARG00000092919	zp3c	exon	1
chr1	ENSDART00000142957	ENSDARG00000069415	col17a1a	exon	1
chr1	ENSDART00000132405	ENSDARG00000031894	lef1	exon	1
chr1	ENSDART00000132405	ENSDARG00000031894	lef1	exon	1
chr1	ENSDART00000138878	ENSDARG00000061629	ndufaf5	exon	1
chr1	ENSDART00000074196	ENSDARG00000052361	il15	exon	1
chr1	ENSDART00000130675	ENSDARG00000033666	pi4k2a	exon	1
chr1	ENSDART00000137909	ENSDARG00000079062	samd1b	exon	1
chr1	ENSDART00000064194	ENSDARG00000043713	asf1bb	exon	1
chr1	ENSDART00000037576	ENSDARG00000025074	CABZ01059390.1	exon	1
chr18	ENSDART00000132249	ENSDARG00000026664	uri1	exon	1
chr18	ENSDART00000135236	ENSDARG00000069122	si:ch211-216l23.2	exon	1
chr18	ENSDART00000097566	ENSDARG00000067741	itpkcb	exon	1
chr18	ENSDART00000078053	ENSDARG00000068404	tbcb	exon	1
chr18	ENSDART00000087445	ENSDARG00000061370	TSEN34	exon	1
chr18	ENSDART00000139526	ENSDARG00000078983	fam118b	exon	1
chr18	ENSDART00000010813	ENSDARG00000012788	foxa3	exon	1
chr18	ENSDART00000082496	ENSDARG00000059386	dtwd1	exon	1
chr18	ENSDART00000058967	ENSDARG00000040296	rap2b	exon	1
chr18	ENSDART00000121503	ENSDARG00000089486	cplx3b	exon	1
chr23	ENSDART00000035693	ENSDARG00000026540	ppp4r2a	exon	1
chr23	ENSDART00000081016	ENSDARG00000058203	smc1al	exon	1
chr23	ENSDART00000083947	ENSDARG00000059956	ptk6b	exon	1
chr23	ENSDART00000135430	ENSDARG00000019205	fam120c	exon	1
chr23	ENSDART00000135430	ENSDARG00000019205	fam120c	exon	1
chr23	ENSDART00000054479	ENSDARG00000037432	haus7	exon	1
chr23	ENSDART00000134587	ENSDARG00000011510	rcc2	exon	1
chr23	ENSDART00000054337	ENSDARG00000034975	gpr157	exon	1
chr23	ENSDART00000016248	ENSDARG00000070657	pa2g4b	exon	1
chr23	ENSDART00000110670	ENSDARG00000078574	SENP1	exon	1
chr23	ENSDART00000110670	ENSDARG00000078574	SENP1	exon	1
chr23	ENSDART00000145639	ENSDARG00000093702	C23H1orf115 (1 of 2)	exon	1
chr23	ENSDART00000138849	ENSDARG00000000887	GTSF1	exon	1
chr23	ENSDART00000136386	ENSDARG00000092856	si:ch211-210c8.7	exon	1
chr23	ENSDART00000108986	ENSDARG00000078085	SNRPG	exon	1
chr23	ENSDART00000013449	ENSDARG00000004018	CHST13	exon	1
chr23	ENSDART00000078253	ENSDARG00000055856	zgc:194342	exon	1
chr23	ENSDART00000024313	ENSDARG00000009524	rnf150b	exon	1
chr23	ENSDART00000132361	ENSDARG00000039007	eno3	exon	1
chr16	ENSDART00000079497	ENSDARG00000056914	zgc:136360	exon	1
chr16	ENSDART00000021596	ENSDARG00000002006	rxrbb	exon	1
chr16	ENSDART00000131582	ENSDARG00000092158	cbx3b	exon	1
chr16	ENSDART00000103431	ENSDARG00000011245	esrp1	exon	1
chr16	ENSDART00000027545	ENSDARG00000019008	erp44	exon	1
chr16	ENSDART00000122681	ENSDARG00000088805	nes	exon	1
chr16	ENSDART00000039109	ENSDARG00000037633	leng1	exon	1
chr16	ENSDART00000102016	ENSDARG00000041980	fam26f	exon	1
chr16	ENSDART00000102016	ENSDARG00000041980	fam26f	exon	1
chr16	ENSDART00000006061	ENSDARG00000004724	tcea3	exon	1
chr16	ENSDART00000037797	ENSDARG00000028367	sult2st3	exon	1
chr16	ENSDART00000144206	ENSDARG00000093817	hmgn2	exon	1
chr16	ENSDART00000024729	ENSDARG00000017219	pabpc1a	exon	1
chr13	ENSDART00000111438	ENSDARG00000074686	mgea5	exon	1
chr13	ENSDART00000137761	ENSDARG00000075269	si:dkey-20i10.7	exon	1
chr13	ENSDART00000020576	ENSDARG00000010792	cdc25	exon	1
chr13	ENSDART00000020576	ENSDARG00000010792	cdc25	exon	1
chr13	ENSDART00000140312	ENSDARG00000057166	C13H10orf11	exon	1
chr13	ENSDART00000140142	ENSDARG00000021404	zgc:110319	exon	1
chr13	ENSDART00000140142	ENSDARG00000021404	zgc:110319	exon	1
chr13	ENSDART00000111774	ENSDARG00000077728	supv3l1	exon	1
chr13	ENSDART00000133049	ENSDARG00000039349	si:ch211-26a17.7	exon	1
chr13	ENSDART00000145300	ENSDARG00000005423	pgam1a	exon	1
chr13	ENSDART00000003888	ENSDARG00000003827	snapc1b	exon	1
chr13	ENSDART00000074761	ENSDARG00000052833	zfand3	exon	1
chr13	ENSDART00000074499	ENSDARG00000052610	olig4	exon	1
chr13	ENSDART00000056962	ENSDARG00000039020	fbxo5	exon	1
chr13	ENSDART00000006892	ENSDARG00000009136	tp53bp2	exon	1
chr13	ENSDART00000058161	ENSDARG00000039778	NEDD4	exon	1
chr13	ENSDART00000127624	ENSDARG00000044075	nkx6.2	exon	1
chr13	ENSDART00000137454	ENSDARG00000092094	HTRA2 (4 of 31)	exon	1
chr25	ENSDART00000091292	ENSDARG00000062846	tmtc3	exon	1
chr25	ENSDART00000109520	ENSDARG00000034497	fbxl14a	exon	1
chr25	ENSDART00000110123	ENSDARG00000079835	MAN2C1	exon	1
chr25	ENSDART00000067028	ENSDARG00000045586	zgc:172145	exon	1
chr25	ENSDART00000045177	ENSDARG00000034256	cdk10	exon	1
chr25	ENSDART00000012603	ENSDARG00000038363	drd4a	exon	1
chr6	ENSDART00000091700	ENSDARG00000063009	C6H2orf62	exon	1
chr6	ENSDART00000063648	ENSDARG00000043361	nck2b	exon	1
chr6	ENSDART00000053180	ENSDARG00000036612	ift27	exon	1
chr6	ENSDART00000137268	ENSDARG00000052030	akr1a1b	exon	1
chr6	ENSDART00000137268	ENSDARG00000052030	akr1a1b	exon	1
chr6	ENSDART00000135434	ENSDARG00000041072	mier1a	exon	1
chr6	ENSDART00000104180	ENSDARG00000044332	zranb2	exon	1
chr6	ENSDART00000104180	ENSDARG00000044332	zranb2	exon	1
chr6	ENSDART00000019939	ENSDARG00000010255	bin2b	exon	1
chr6	ENSDART00000064903	ENSDARG00000044203	sumf1	exon	1
chr6	ENSDART00000034730	ENSDARG00000021669	sec61al1	exon	1
chr6	ENSDART00000111639	ENSDARG00000075670	rereb	exon	1
chr6	ENSDART00000004295	ENSDARG00000017657	C6H1orf74	exon	1
chr6	ENSDART00000028217	ENSDARG00000025397	srsf3a	exon	1
chr6	ENSDART00000117363	ENSDARG00000080515	dre-let-7j	exon	1
chr6	ENSDART00000014552	ENSDARG00000006915	arl8ba	exon	1
chr6	ENSDART00000114920	ENSDARG00000078075	C6H6orf106	exon	1
chr6	ENSDART00000128065	ENSDARG00000091831	ddx27	exon	1
chr6	ENSDART00000083499	ENSDARG00000059794	kdm6al	exon	1
chr6	ENSDART00000127900	ENSDARG00000058337	nop58	exon	1
chr6	ENSDART00000012903	ENSDARG00000003287	wdr12	exon	1
chr3	ENSDART00000142037	ENSDARG00000071050	si:ch211-8c17.4	exon	1
chr3	ENSDART00000141808	ENSDARG00000057679	sh2b1	exon	1
chr3	ENSDART00000144369	ENSDARG00000002339	ccdc101	exon	1
chr3	ENSDART00000144147	ENSDARG00000093569	bckdhbl	exon	1
chr3	ENSDART00000141100	ENSDARG00000077291	rps2	exon	1
chr3	ENSDART00000140330	ENSDARG00000093192	si:ch211-198m1.1	exon	1
chr3	ENSDART00000111528	ENSDARG00000075380	kri1	exon	1
chr3	ENSDART00000104118	ENSDARG00000029331	atxn7l3	exon	1
chr3	ENSDART00000118208	ENSDARG00000081638	dre-mir-10c	exon	1
chr3	ENSDART00000118208	ENSDARG00000081638	dre-mir-10c	exon	1
chr3	ENSDART00000077493	ENSDARG00000093235	TST	exon	1
chr3	ENSDART00000039448	ENSDARG00000022525	mchr1b	exon	1
chr3	ENSDART00000022135	ENSDARG00000018130	rhot1a	exon	1
chr3	ENSDART00000143697	ENSDARG00000055731	si:dkeyp-69e1.8	exon	1
chr3	ENSDART00000076636	ENSDARG00000054438	fzd2	exon	1
chr3	ENSDART00000142856	ENSDARG00000031776	zgc:92066	exon	1
chr3	ENSDART00000035545	ENSDARG00000010246	prmt1	exon	1
chr3	ENSDART00000102952	ENSDARG00000070256	suz12a	exon	1
chr3	ENSDART00000018626	ENSDARG00000002967	pdap1	exon	1
chr3	ENSDART00000083212	ENSDARG00000059680	fscn1a	exon	1
chr3	ENSDART00000147777	ENSDARG00000059622	ubfd1	exon	1
chr3	ENSDART00000033369	ENSDARG00000026534	axin1	exon	1
chr3	ENSDART00000126180	ENSDARG00000089883	AL840631.2	exon	1
chr3	ENSDART00000132587	ENSDARG00000069729	mpg	exon	1
chr9	ENSDART00000146706	ENSDARG00000078593	vwa8	exon	1
chr9	ENSDART00000137024	ENSDARG00000069917	ska3	exon	1
chr9	ENSDART00000062656	ENSDARG00000003675	cryl1	exon	1
chr9	ENSDART00000135356	ENSDARG00000004692	nabp1a	exon	1
chr9	ENSDART00000141837	ENSDARG00000019496	esd	exon	1
chr9	ENSDART00000111039	ENSDARG00000075033	GTPBP8	exon	1
chr9	ENSDART00000064156	ENSDARG00000056886	tbccd1	exon	1
chr9	ENSDART00000101319	ENSDARG00000069549	zgc:162396	exon	1
chr9	ENSDART00000089539	ENSDARG00000062148	SENP7 (2 of 2)	exon	1
chr9	ENSDART00000048753	ENSDARG00000030789	ddx18	exon	1
chr9	ENSDART00000048753	ENSDARG00000030789	ddx18	exon	1
chr9	ENSDART00000132501	ENSDARG00000061062	tmem194b	exon	1
chr9	ENSDART00000059586	ENSDARG00000009567	SPEG (1 of 2)	exon	1
chr9	ENSDART00000025256	ENSDARG00000031422	igfbp2b	exon	1
chr9	ENSDART00000113248	ENSDARG00000075154	B3GALT1	exon	1
chr9	ENSDART00000113914	ENSDARG00000042032	pou3f3a	exon	1
chr9	ENSDART00000122526	ENSDARG00000042115	tmem198a	exon	1
chr9	ENSDART00000147820	ENSDARG00000077119	CARKD	exon	1
chr12	ENSDART00000110458	ENSDARG00000079252	FAM117A (2 of 2)	exon	1
chr12	ENSDART00000029133	ENSDARG00000023299	nhp2l1b	exon	1
chr12	ENSDART00000149229	ENSDARG00000095891	si:ch73-30l9.1	exon	1
chr12	ENSDART00000066439	ENSDARG00000045190	ch25h	exon	1
chr12	ENSDART00000041711	ENSDARG00000031048	gspt1	exon	1
chr12	ENSDART00000045071	ENSDARG00000030583	foxk2	exon	1
chr12	ENSDART00000066282	ENSDARG00000054707	dhx8	exon	1
chr12	ENSDART00000080173	ENSDARG00000057484	srsf2a	exon	1
chr12	ENSDART00000018939	ENSDARG00000076225	tha1	exon	1
chr12	ENSDART00000018939	ENSDARG00000076225	tha1	exon	1
chr12	ENSDART00000041424	ENSDARG00000053331	sult2st2	exon	1
chr12	ENSDART00000062858	ENSDARG00000042827	adoa	exon	1
chr20	ENSDART00000063912	ENSDARG00000043531	jun	exon	1
chr20	ENSDART00000141591	ENSDARG00000094224	si:dkey-219e20.2	exon	1
chr20	ENSDART00000122351	ENSDARG00000022650	cyp2ad3	exon	1
chr20	ENSDART00000078385	ENSDARG00000004517	ppat	exon	1
chr20	ENSDART00000142611	ENSDARG00000011445	C20H14orf43 (2 of 2)	exon	1
chr20	ENSDART00000132556	ENSDARG00000093972	ftr79	exon	1
chr20	ENSDART00000008306	ENSDARG00000023040	zbtb1	exon	1
chr20	ENSDART00000067397	ENSDARG00000033134	C20H2orf56	exon	1
chr20	ENSDART00000022702	ENSDARG00000004049	marcksa	exon	1
chr20	ENSDART00000137837	ENSDARG00000004877	rock2b	exon	1
chr20	ENSDART00000061659	ENSDARG00000031100	ivns1abpa	exon	1
chr20	ENSDART00000135789	ENSDARG00000042033	mettl11b	exon	1
chr20	ENSDART00000033325	ENSDARG00000008568	zgc:92470	exon	1
chr20	ENSDART00000114262	ENSDARG00000016464	CDC42BPA (2 of 2)	exon	1
chr20	ENSDART00000022572	ENSDARG00000008249	ptchd4	exon	1
chr20	ENSDART00000149001	ENSDARG00000069245	matn3a	exon	1
chr20	ENSDART00000143858	ENSDARG00000041411	rad51	exon	1
chr20	ENSDART00000113791	ENSDARG00000077221	CR385078.1	exon	1
chr20	ENSDART00000028807	ENSDARG00000024143	MGST3	exon	1
chr20	ENSDART00000130507	ENSDARG00000014532	aida	exon	1
chr20	ENSDART00000136779	ENSDARG00000093659	entpd5b	exon	1
chr14	ENSDART00000106147	ENSDARG00000037393	slc43a1a	exon	1
chr14	ENSDART00000108585	ENSDARG00000079125	SOWAHA (2 of 2)	exon	1
chr14	ENSDART00000079385	ENSDARG00000056830	HNRNPUL2	exon	1
chr14	ENSDART00000122660	ENSDARG00000089302	hnrnpa0a	exon	1
chr14	ENSDART00000128463	ENSDARG00000071586	tgfbi	exon	1
chr14	ENSDART00000017075	ENSDARG00000016143	xiap	exon	1
chr14	ENSDART00000139552	ENSDARG00000004270	atl3	exon	1
chr14	ENSDART00000139552	ENSDARG00000004270	atl3	exon	1
chr14	ENSDART00000139975	ENSDARG00000004270	atl3	exon	1
chr14	ENSDART00000144921	ENSDARG00000004270	atl3	exon	1
chr14	ENSDART00000002250	ENSDARG00000012025	hs6st2	exon	1
chr14	ENSDART00000002684	ENSDARG00000017931	ddx26b	exon	1
chr14	ENSDART00000105721	ENSDARG00000071478	lnx2b	exon	1
chr14	ENSDART00000141561	ENSDARG00000071478	lnx2b	exon	1
chr14	ENSDART00000135556	ENSDARG00000075048	lonrf1	exon	1
chr14	ENSDART00000111189	ENSDARG00000076526	gar1	exon	1
chr14	ENSDART00000135479	ENSDARG00000040198	fstl5	exon	1
chr15	ENSDART00000146735	ENSDARG00000058219	tubd1	exon	1
chr15	ENSDART00000114888	ENSDARG00000014137	picalml	exon	1
chr15	ENSDART00000114888	ENSDARG00000014137	picalml	exon	1
chr15	ENSDART00000148311	ENSDARG00000040571	ube4a	exon	1
chr15	ENSDART00000023842	ENSDARG00000009273	ppm1da	exon	1
chr15	ENSDART00000102086	ENSDARG00000069888	cldna	exon	1
chr15	ENSDART00000086592	ENSDARG00000061030	vezf1b	exon	1
chr15	ENSDART00000129285	ENSDARG00000091226	AL929092.5	exon	1
chr15	ENSDART00000129228	ENSDARG00000089689	TEX26	exon	1
chr15	ENSDART00000076229	ENSDARG00000054087	IRS1	exon	1
chr15	ENSDART00000059484	ENSDARG00000040628	zgc:110333	exon	1
chr15	ENSDART00000041249	ENSDARG00000003973	CHORDC1 (1 of 2)	exon	1
chr15	ENSDART00000058993	ENSDARG00000040314	PSPH	exon	1
chr15	ENSDART00000062856	ENSDARG00000042825	RNF169	exon	1
chr15	ENSDART00000114410	ENSDARG00000060312	WDR62	exon	1
chr15	ENSDART00000135442	ENSDARG00000059303	hnrnpl2	exon	1
chr8	ENSDART00000133830	ENSDARG00000058053	SERPING1	exon	1
chr8	ENSDART00000057645	ENSDARG00000039459	qsox1	exon	1
chr8	ENSDART00000035433	ENSDARG00000025914	si:dkey-190g11.3	exon	1
chr8	ENSDART00000110249	ENSDARG00000029859	C8H1orf228	exon	1
chr8	ENSDART00000075126	ENSDARG00000053133	zgc:91787	exon	1
chr8	ENSDART00000064394	ENSDARG00000025108	si:ch211-157c18.2	exon	1
chr8	ENSDART00000063075	ENSDARG00000042961	zgc:100920	exon	1
chr8	ENSDART00000083108	ENSDARG00000059646	nt5dc2	exon	1
chr8	ENSDART00000149442	ENSDARG00000095822	si:dkey-176g4.5	exon	1
chr8	ENSDART00000062403	ENSDARG00000055757	tmem9	exon	1
chr8	ENSDART00000047008	ENSDARG00000055759	efhd2	exon	1
chr8	ENSDART00000058100	ENSDARG00000039754	xpc	exon	1
chr8	ENSDART00000147912	ENSDARG00000092123	si:dkey-20d21.12	exon	1
chr8	ENSDART00000019937	ENSDARG00000019417	gadd45g	exon	1
chr8	ENSDART00000064197	ENSDARG00000043716	cldn5a	exon	1
chr8	ENSDART00000008058	ENSDARG00000011855	AAK1 (2 of 2)	exon	1
chr8	ENSDART00000122692	ENSDARG00000086057	PLXND1	exon	1
chr4	ENSDART00000049066	ENSDARG00000032765	net1	exon	1
chr4	ENSDART00000150693	ENSDARG00000096135	si:dkey-6a5.10	exon	1
chr4	ENSDART00000124189	ENSDARG00000057334	cmasa	exon	1
chr4	ENSDART00000005985	ENSDARG00000002952	smo	exon	1
chr4	ENSDART00000148486	ENSDARG00000045885	scaf11	exon	1
chr4	ENSDART00000067434	ENSDARG00000045878	nudt4b	exon	1
chr4	ENSDART00000007030	ENSDARG00000006011	klhdc5	exon	1
chr4	ENSDART00000130409	ENSDARG00000018111	jhdm1da	exon	1
chr4	ENSDART00000128692	ENSDARG00000086116	dre-mir-430b-4	exon	1
chr4	ENSDART00000127128	ENSDARG00000087570	dre-mir-430c-18	exon	1
chr4	ENSDART00000150596	ENSDARG00000094903	si:ch211-231i17.4	exon	1
chr4	ENSDART00000121472	ENSDARG00000090166	CR356223.2	exon	1
chr4	ENSDART00000150409	ENSDARG00000045843	apex1	exon	1
chr4	ENSDART00000027304	ENSDARG00000006409	mapk12b	exon	1
chr4	ENSDART00000021753	ENSDARG00000009607	ccnc	exon	1
chr4	ENSDART00000149218	ENSDARG00000018688	elk3	exon	1
chr4	ENSDART00000150375	ENSDARG00000093934	si:ch211-281k12.1	exon	1
chr4	ENSDART00000150375	ENSDARG00000093934	si:ch211-281k12.1	exon	1
chr4	ENSDART00000136283	ENSDARG00000094000	si:dkey-153k10.6	exon	1
chr24	ENSDART00000114762	ENSDARG00000075113	nanog	exon	1
chr24	ENSDART00000149134	ENSDARG00000045401	mllt10	exon	1
chr24	ENSDART00000084954	ENSDARG00000077532	PIGN	exon	1
chr24	ENSDART00000125190	ENSDARG00000003941	rrs1	exon	1
chr24	ENSDART00000123911	ENSDARG00000086243	CR391995.2	exon	1
chr24	ENSDART00000143723	ENSDARG00000019976	idi1	exon	1
chr24	ENSDART00000141414	ENSDARG00000038556	C24H8orf33	exon	1
chr24	ENSDART00000130340	ENSDARG00000079278	zgc:174877	exon	1
chr19	ENSDART00000091615	ENSDARG00000062976	iffo1a	exon	1
chr19	ENSDART00000141491	ENSDARG00000094748	si:dkey-14o18.7	exon	1
chr19	ENSDART00000023571	ENSDARG00000011740	u2af2b	exon	1
chr19	ENSDART00000141292	ENSDARG00000020228	usf2	exon	1
chr19	ENSDART00000142077	ENSDARG00000056307	ZNF706	exon	1
chr19	ENSDART00000146548	ENSDARG00000016999	lin28a	exon	1
chr19	ENSDART00000146548	ENSDARG00000016999	lin28a	exon	1
chr19	ENSDART00000109024	ENSDARG00000059674	lrp12	exon	1
chr19	ENSDART00000104451	ENSDARG00000057946	leprel4	exon	1
chr19	ENSDART00000123519	ENSDARG00000089002	ube2e1	exon	1
chr19	ENSDART00000130695	ENSDARG00000034195	top2b	exon	1
chr19	ENSDART00000145246	ENSDARG00000011648	snrpd1	exon	1
chr19	ENSDART00000147911	ENSDARG00000036214	dazl	exon	1
chr19	ENSDART00000038942	ENSDARG00000028431	adnp2b	exon	1
chr19	ENSDART00000021396	ENSDARG00000004311	ldlrap1a	exon	1
chr19	ENSDART00000052292	ENSDARG00000036015	C19H6orf52	exon	1
chr19	ENSDART00000103471	ENSDARG00000070475	khdrbs1b	exon	1
chr19	ENSDART00000052183	ENSDARG00000093406	C19H6orf62	exon	1
chr19	ENSDART00000132213	ENSDARG00000006859	nkain1	exon	1
chr19	ENSDART00000122849	ENSDARG00000018440	EPS8	exon	1
chr19	ENSDART00000144262	ENSDARG00000093356	undef	exon	1
chr10	ENSDART00000109432	ENSDARG00000079049	cercam	exon	1
chr10	ENSDART00000135527	ENSDARG00000063194	lin54	exon	1
chr10	ENSDART00000135527	ENSDARG00000063194	lin54	exon	1
chr10	ENSDART00000140084	ENSDARG00000094850	si:dkey-88l16.5	exon	1
chr10	ENSDART00000024450	ENSDARG00000002271	zfand5b	exon	1
chr10	ENSDART00000122922	ENSDARG00000091105	CR396586.2	exon	1
chr10	ENSDART00000118734	ENSDARG00000081705	U8	exon	1
chr10	ENSDART00000064875	ENSDARG00000032083	dpysl2b	exon	1
chr10	ENSDART00000135157	ENSDARG00000094461	si:dkey-106m10.6	exon	1
chr10	ENSDART00000079597	ENSDARG00000057021	vps36	exon	1
chr10	ENSDART00000134491	ENSDARG00000053884	med13a	exon	1
chr10	ENSDART00000132288	ENSDARG00000092847	si:dkey-30j19.3	exon	1
chr10	ENSDART00000148151	ENSDARG00000095012	si:ch211-249g19.14	exon	1
chr10	ENSDART00000117940	ENSDARG00000083624	dre-mir-430a-1	exon	1
chr10	ENSDART00000141500	ENSDARG00000093535	si:ch211-265m20.8	exon	1
chr10	ENSDART00000133463	ENSDARG00000017234	npy8ar	exon	1
chr10	ENSDART00000123608	ENSDARG00000087243	zgc:100918	exon	1
chr10	ENSDART00000139825	ENSDARG00000069590	tmem150c	exon	1
chr10	ENSDART00000138537	ENSDARG00000021082	sec31a	exon	1
chr10	ENSDART00000063093	ENSDARG00000042975	auh	exon	1
chr10	ENSDART00000129643	ENSDARG00000036670	aplnrb	exon	1
chr5	ENSDART00000148087	ENSDARG00000014817	ranbp1	exon	1
chr5	ENSDART00000051623	ENSDARG00000035610	zgc:113208	exon	1
chr5	ENSDART00000140602	ENSDARG00000003032	eif4a1b	exon	1
chr5	ENSDART00000046384	ENSDARG00000002830	trmt2a	exon	1
chr5	ENSDART00000148201	ENSDARG00000020024	fam151b	exon	1
chr5	ENSDART00000017696	ENSDARG00000020024	fam151b	exon	1
chr5	ENSDART00000051483	ENSDARG00000035515	TM2D2	exon	1
chr5	ENSDART00000078660	ENSDARG00000056204	GIN1	exon	1
chr5	ENSDART00000137324	ENSDARG00000027750	dpp7	exon	1
chr5	ENSDART00000077189	ENSDARG00000054906	ier5l	exon	1
chr5	ENSDART00000077189	ENSDARG00000054906	ier5l	exon	1
chr5	ENSDART00000061149	ENSDARG00000041723	TUBB4A (3 of 3)	exon	1
chr5	ENSDART00000098010	ENSDARG00000035415	ptger4b	exon	1
chr5	ENSDART00000148549	ENSDARG00000012219	dpf2	exon	1
chr5	ENSDART00000140992	ENSDARG00000027345	mpzl2	exon	1
chr5	ENSDART00000140992	ENSDARG00000027345	mpzl2	exon	1
chr5	ENSDART00000097525	ENSDARG00000067713	snx18a	exon	1
chr5	ENSDART00000132410	ENSDARG00000093270	si:ch211-219f7.2	exon	1
chr5	ENSDART00000097574	ENSDARG00000035285	ncor1	exon	1
chr5	ENSDART00000035235	ENSDARG00000002369	UBB	exon	1
chr5	ENSDART00000149868	ENSDARG00000053021	grsf1	exon	1
chr5	ENSDART00000110076	ENSDARG00000077298	gas1a	exon	1
chr5	ENSDART00000113738	ENSDARG00000008904	smarca2	exon	1
chr5	ENSDART00000022866	ENSDARG00000052462	pisd	exon	1
chr5	ENSDART00000050879	ENSDARG00000035133	pho	exon	1
chr5	ENSDART00000043638	ENSDARG00000035126	brd3b	exon	1
chr5	ENSDART00000122863	ENSDARG00000052148	ptgs1	exon	1
chr5	ENSDART00000121947	ENSDARG00000040346	ephb4a	exon	1
chr5	ENSDART00000118106	ENSDARG00000083389	SNORA57	exon	1
chr5	ENSDART00000073663	ENSDARG00000039501	ugt2a6	exon	1
chr5	ENSDART00000137774	ENSDARG00000091930	si:ch211-12e13.1	exon	1
chr11	ENSDART00000136108	ENSDARG00000044942	mrpl45	exon	2
chr11	ENSDART00000110621	ENSDARG00000077404	ncoa3	exon	2
chr11	ENSDART00000067698	ENSDARG00000046045	hoxc6b	exon	2
chr11	ENSDART00000065984	ENSDARG00000044894	zgc:113307	exon	2
chr11	ENSDART00000103865	ENSDARG00000032161	srgap2a	exon	2
chr11	ENSDART00000124131	ENSDARG00000025699	mbd1	exon	2
chr21	ENSDART00000080693	ENSDARG00000057936	lhx5	exon	2
chr21	ENSDART00000135605	ENSDARG00000057928	MZT2A	exon	2
chr21	ENSDART00000065670	ENSDARG00000044691	ppp1r3b	exon	2
chr21	ENSDART00000148236	ENSDARG00000069495	tmem179b	exon	2
chr21	ENSDART00000003962	ENSDARG00000007217	wdr55	exon	2
chr21	ENSDART00000112400	ENSDARG00000078063	bnip1b	exon	2
chr7	ENSDART00000111619	ENSDARG00000075403	gpha2	exon	2
chr7	ENSDART00000052541	ENSDARG00000036180	ccnb2	exon	2
chr7	ENSDART00000130987	ENSDARG00000035756	zgc:77702	exon	2
chr7	ENSDART00000148514	ENSDARG00000003519	aprt	exon	2
chr7	ENSDART00000112544	ENSDARG00000073928	mrc1a	exon	2
chr17	ENSDART00000090447	ENSDARG00000062501	hhipl1	exon	2
chr17	ENSDART00000139091	ENSDARG00000070794	greb1	exon	2
chr17	ENSDART00000097737	ENSDARG00000067841	CABZ01076817.1	exon	2
chr17	ENSDART00000103870	ENSDARG00000070612	GREM1 (1 of 3)	exon	2
chr2	ENSDART00000142873	ENSDARG00000094331	si:dkey-189n19.3	exon	2
chr2	ENSDART00000112131	ENSDARG00000079671	lppr4a	exon	2
chr2	ENSDART00000144149	ENSDARG00000035859	angptl4	exon	2
chr2	ENSDART00000082083	ENSDARG00000074146	zgc:113452	exon	2
chr2	ENSDART00000005382	ENSDARG00000013576	gadd45bb	exon	2
chr2	ENSDART00000143433	ENSDARG00000068232	cbln12	exon	2
chr2	ENSDART00000098284	ENSDARG00000053293	ftr14	exon	2
chr22	ENSDART00000139297	ENSDARG00000071570	CCDC71	exon	2
chr22	ENSDART00000129766	ENSDARG00000020467	safb	exon	2
chr22	ENSDART00000021666	ENSDARG00000002215	rtca	exon	2
chr22	ENSDART00000139258	ENSDARG00000095269	si:ch73-138e16.4	exon	2
chr1	ENSDART00000020970	ENSDARG00000018178	pgm2	exon	2
chr1	ENSDART00000137138	ENSDARG00000095593	si:ch211-134c9.2	exon	2
chr1	ENSDART00000021336	ENSDARG00000030972	dnaja1l	exon	2
chr18	ENSDART00000089853	ENSDARG00000062269	fan1	exon	2
chr18	ENSDART00000089853	ENSDARG00000062269	fan1	exon	2
chr18	ENSDART00000143833	ENSDARG00000056014	si:dkey-47k20.7	exon	2
chr18	ENSDART00000147102	ENSDARG00000094555	si:dkey-30c15.15	exon	2
chr23	ENSDART00000089999	ENSDARG00000062329	B4GALT3	exon	2
chr23	ENSDART00000143756	ENSDARG00000056438	her9	exon	2
chr23	ENSDART00000085642	ENSDARG00000060626	DGKA (1 of 2)	exon	2
chr23	ENSDART00000103038	ENSDARG00000070340	hoxc5a	exon	2
chr23	ENSDART00000103132	ENSDARG00000070338	hoxc4a	exon	2
chr23	ENSDART00000055099	ENSDARG00000037815	b4galt5	exon	2
chr23	ENSDART00000112598	ENSDARG00000077810	otud4	exon	2
chr16	ENSDART00000079383	ENSDARG00000056819	hoxa9b	exon	2
chr16	ENSDART00000149411	ENSDARG00000060862	atxn1b	exon	2
chr16	ENSDART00000142102	ENSDARG00000055889	zgc:153215	exon	2
chr16	ENSDART00000131814	ENSDARG00000095197	si:ch211-280c20.7	exon	2
chr16	ENSDART00000101885	ENSDARG00000094201	zdhhc18a	exon	2
chr16	ENSDART00000029413	ENSDARG00000028514	cited4b	exon	2
chr16	ENSDART00000149260	ENSDARG00000058597	nt5c3	exon	2
chr13	ENSDART00000102511	ENSDARG00000037079	ccdc104	exon	2
chr13	ENSDART00000023806	ENSDARG00000021404	zgc:110319	exon	2
chr13	ENSDART00000042049	ENSDARG00000031915	hif1an	exon	2
chr13	ENSDART00000128951	ENSDARG00000069327	nkx3.3	exon	2
chr13	ENSDART00000145409	ENSDARG00000093304	si:dkey-221j11.3	exon	2
chr25	ENSDART00000067073	ENSDARG00000045612	lrrc10	exon	2
chr25	ENSDART00000088383	ENSDARG00000061802	CNOT2	exon	2
chr25	ENSDART00000050619	ENSDARG00000095660	slc10a3	exon	2
chr6	ENSDART00000103100	ENSDARG00000070329	cbx8b	exon	2
chr6	ENSDART00000065212	ENSDARG00000044405	ttc4	exon	2
chr6	ENSDART00000113706	ENSDARG00000075297	trnt1	exon	2
chr6	ENSDART00000081275	ENSDARG00000077888	slain1b	exon	2
chr3	ENSDART00000065922	ENSDARG00000044852	wbp2	exon	2
chr3	ENSDART00000017594	ENSDARG00000011579	hoxb10a	exon	2
chr3	ENSDART00000023674	ENSDARG00000056023	hoxb9a	exon	2
chr3	ENSDART00000077029	ENSDARG00000054793	emc10	exon	2
chr3	ENSDART00000145331	ENSDARG00000031776	zgc:92066	exon	2
chr3	ENSDART00000146529	ENSDARG00000060192	rpusd1	exon	2
chr3	ENSDART00000055228	ENSDARG00000037892	psmc3ip	exon	2
chr3	ENSDART00000146867	ENSDARG00000011665	aldoaa	exon	2
chr3	ENSDART00000103486	ENSDARG00000077052	TNRC18	exon	2
chr3	ENSDART00000102429	ENSDARG00000037871	wipi2	exon	2
chr3	ENSDART00000083129	ENSDARG00000059654	eif3ba	exon	2
chr3	ENSDART00000040753	ENSDARG00000030573	nudt1	exon	2
chr3	ENSDART00000076007	ENSDARG00000074661	gper	exon	2
chr9	ENSDART00000082355	ENSDARG00000059276	hoxd4a	exon	2
chr9	ENSDART00000082355	ENSDARG00000059276	hoxd4a	exon	2
chr9	ENSDART00000133017	ENSDARG00000077643	lypd6b	exon	2
chr9	ENSDART00000128357	ENSDARG00000040065	cx45.6	exon	2
chr9	ENSDART00000123074	ENSDARG00000042467	tlk1a	exon	2
chr12	ENSDART00000031408	ENSDARG00000004415	tcf7l2	exon	2
chr20	ENSDART00000132008	ENSDARG00000091983	si:ch73-249k16.1	exon	2
chr20	ENSDART00000137007	ENSDARG00000003058	fgfr1op	exon	2
chr20	ENSDART00000124497	ENSDARG00000070052	tdrd6	exon	2
chr14	ENSDART00000053471	ENSDARG00000036829	CR848787.1	exon	2
chr14	ENSDART00000080138	ENSDARG00000057494	ptcd3	exon	2
chr14	ENSDART00000110191	ENSDARG00000075467	shisa3	exon	2
chr14	ENSDART00000097214	ENSDARG00000067545	adam19b	exon	2
chr15	ENSDART00000129474	ENSDARG00000089444	OMG (2 of 2)	exon	2
chr15	ENSDART00000112320	ENSDARG00000077111	fzd4	exon	2
chr15	ENSDART00000062856	ENSDARG00000042825	RNF169	exon	2
chr8	ENSDART00000146965	ENSDARG00000057648	dnttip2	exon	2
chr8	ENSDART00000138206	ENSDARG00000092245	si:dkey-157o17.2	exon	2
chr8	ENSDART00000140750	ENSDARG00000015164	mknk2b	exon	2
chr8	ENSDART00000134488	ENSDARG00000094281	si:ch73-196i15.3	exon	2
chr8	ENSDART00000063075	ENSDARG00000042961	zgc:100920	exon	2
chr8	ENSDART00000133440	ENSDARG00000090721	prdm2a	exon	2
chr8	ENSDART00000134226	ENSDARG00000061204	ddx20	exon	2
chr8	ENSDART00000043902	ENSDARG00000033706	adora2aa	exon	2
chr8	ENSDART00000145618	ENSDARG00000093188	si:dkey-75a21.2	exon	2
chr8	ENSDART00000074915	ENSDARG00000052960	nppa	exon	2
chr8	ENSDART00000122692	ENSDARG00000086057	PLXND1	exon	2
chr4	ENSDART00000111294	ENSDARG00000079222	zgc:174315	exon	2
chr4	ENSDART00000150350	ENSDARG00000096167	si:dkey-56m15.6	exon	2
chr4	ENSDART00000150541	ENSDARG00000094039	si:dkey-30f3.2	exon	2
chr4	ENSDART00000150365	ENSDARG00000087442	si:ch211-208f21.5	exon	2
chr4	ENSDART00000108499	ENSDARG00000078728	zgc:173710	exon	2
chr4	ENSDART00000002783	ENSDARG00000017549	phyh	exon	2
chr4	ENSDART00000080842	ENSDARG00000058042	kitlgb	exon	2
chr4	ENSDART00000128734	ENSDARG00000045708	adm2a	exon	2
chr24	ENSDART00000144883	ENSDARG00000063344	fam162a	exon	2
chr19	ENSDART00000139385	ENSDARG00000070959	si:ch211-288g17.3	exon	2
chr19	ENSDART00000088917	ENSDARG00000070553	rnmt	exon	2
chr19	ENSDART00000147736	ENSDARG00000009461	hoxa9a	exon	2
chr19	ENSDART00000024208	ENSDARG00000014499	nutf2l	exon	2
chr19	ENSDART00000013666	ENSDARG00000012044	polr3gla	exon	2
chr19	ENSDART00000005119	ENSDARG00000017445	eif3i	exon	2
chr19	ENSDART00000052097	ENSDARG00000035882	hrsp12	exon	2
chr19	ENSDART00000105167	ENSDARG00000071223	zgc:158445	exon	2
chr19	ENSDART00000060283	ENSDARG00000041125	gpr19	exon	2
chr10	ENSDART00000140869	ENSDARG00000094055	si:dkey-88l16.3	exon	2
chr10	ENSDART00000134458	ENSDARG00000095294	si:dkey-200l5.4	exon	2
chr10	ENSDART00000142447	ENSDARG00000043976	etf1	exon	2
chr10	ENSDART00000132823	ENSDARG00000021938	smad9	exon	2
chr10	ENSDART00000149580	ENSDARG00000068894	nrip1b	exon	2
chr10	ENSDART00000142833	ENSDARG00000069726	glis3	exon	2
chr5	ENSDART00000132857	ENSDARG00000035549	UPRT	exon	2
chr5	ENSDART00000142420	ENSDARG00000004587	KAT5 (1 of 2)	exon	2
chr5	ENSDART00000146251	ENSDARG00000094537	si:ch211-137i24.12	exon	2
chr5	ENSDART00000134242	ENSDARG00000018898	zfand5a	exon	2
chr5	ENSDART00000138116	ENSDARG00000035427	surf6	exon	2
chr5	ENSDART00000138116	ENSDARG00000035427	surf6	exon	2
chr5	ENSDART00000122098	ENSDARG00000028401	rhogc	exon	2
chr5	ENSDART00000139616	ENSDARG00000094018	si:dkey-111e8.1	exon	2
chr5	ENSDART00000144469	ENSDARG00000002533	adora2b	exon	2
chr5	ENSDART00000142927	ENSDARG00000031047	ptrh1	exon	2
chr5	ENSDART00000022625	ENSDARG00000018958	nrarpb	exon	2
chr21	ENSDART00000134617	ENSDARG00000012399	adssl	exon	3
chr21	ENSDART00000147123	ENSDARG00000079539	zgc:163077	exon	3
chr21	ENSDART00000142193	ENSDARG00000069373	crcp	exon	3
chr21	ENSDART00000064461	ENSDARG00000043897	st6galnac4	exon	3
chr17	ENSDART00000112765	ENSDARG00000079967	PRKD3	exon	3
chr2	ENSDART00000150227	ENSDARG00000075866	cdcp2	exon	3
chr2	ENSDART00000143885	ENSDARG00000003244	gbp3	exon	3
chr2	ENSDART00000133615	ENSDARG00000091979	si:dkey-20f20.4	exon	3
chr2	ENSDART00000131139	ENSDARG00000074422	GATAD2A	exon	3
chr1	ENSDART00000008469	ENSDARG00000017174	dlx2b	exon	3
chr1	ENSDART00000074604	ENSDARG00000052703	cisd2	exon	3
chr1	ENSDART00000010543	ENSDARG00000008490	ltv1	exon	3
chr1	ENSDART00000059335	ENSDARG00000040543	GPA33 (1 of 2)	exon	3
chr18	ENSDART00000100716	ENSDARG00000069290	bida	exon	3
chr23	ENSDART00000056570	ENSDARG00000038737	phf20b	exon	3
chr23	ENSDART00000013635	ENSDARG00000019311	fbxo30b	exon	3
chr23	ENSDART00000111720	ENSDARG00000037432	haus7	exon	3
chr16	ENSDART00000130403	ENSDARG00000023724	cdc42se1	exon	3
chr16	ENSDART00000023452	ENSDARG00000069995	AL935296.1	exon	3
chr13	ENSDART00000137415	ENSDARG00000021404	zgc:110319	exon	3
chr13	ENSDART00000065435	ENSDARG00000007795	cst3	exon	3
chr25	ENSDART00000124140	ENSDARG00000086342	zgc:101566	exon	3
chr25	ENSDART00000112746	ENSDARG00000077248	zgc:171459	exon	3
chr25	ENSDART00000126879	ENSDARG00000088079	TMED6	exon	3
chr6	ENSDART00000053187	ENSDARG00000057497	stk35l	exon	3
chr3	ENSDART00000055787	ENSDARG00000038281	C3H17orf103 (1 of 2)	exon	3
chr3	ENSDART00000131951	ENSDARG00000020679	clpp	exon	3
chr12	ENSDART00000044860	ENSDARG00000028957	maff	exon	3
chr12	ENSDART00000130582	ENSDARG00000045105	foxn2b	exon	3
chr12	ENSDART00000054788	ENSDARG00000037618	ddit4	exon	3
chr12	ENSDART00000025669	ENSDARG00000005947	slc16a9b	exon	3
chr20	ENSDART00000002463	ENSDARG00000008765	tmed5	exon	3
chr20	ENSDART00000064365	ENSDARG00000043842	C20H1orf198	exon	3
chr20	ENSDART00000008808	ENSDARG00000018913	hmbox1b	exon	3
chr14	ENSDART00000067574	ENSDARG00000011604	olfcg1	exon	3
chr14	ENSDART00000078187	ENSDARG00000055792	FOXO4	exon	3
chr8	ENSDART00000123917	ENSDARG00000057322	TMEM47	exon	3
chr8	ENSDART00000083108	ENSDARG00000059646	nt5dc2	exon	3
chr8	ENSDART00000098913	ENSDARG00000068400	znf131	exon	3
chr4	ENSDART00000048675	ENSDARG00000020015	mrps33	exon	3
chr4	ENSDART00000016382	ENSDARG00000005541	wif1	exon	3
chr4	ENSDART00000048383	ENSDARG00000029071	creld2	exon	3
chr4	ENSDART00000150876	ENSDARG00000079526	NLRX1 (26 of 54)	exon	3
chr4	ENSDART00000123531	ENSDARG00000086197	CABZ01071909.1	exon	3
chr24	ENSDART00000021609	ENSDARG00000015537	gad2	exon	3
chr19	ENSDART00000132237	ENSDARG00000079916	zgc:175136	exon	3
chr19	ENSDART00000008698	ENSDARG00000011312	stk3	exon	3
chr19	ENSDART00000086617	ENSDARG00000061042	gabbr2	exon	3
chr19	ENSDART00000132800	ENSDARG00000035655	rad21b	exon	3
chr19	ENSDART00000091588	ENSDARG00000062962	mll4a	exon	3
chr10	ENSDART00000022840	ENSDARG00000036359	minal	exon	3
chr10	ENSDART00000063923	ENSDARG00000043542	znf259	exon	3
chr10	ENSDART00000099262	ENSDARG00000038159	tcf7l1a	exon	3
chr5	ENSDART00000018895	ENSDARG00000017762	srrt	exon	3
chr11	ENSDART00000050296	ENSDARG00000033175	snrpe	exon	4
chr11	ENSDART00000061288	ENSDARG00000076517	AL929185.1	exon	4
chr17	ENSDART00000133710	ENSDARG00000015998	wdhd1	exon	4
chr17	ENSDART00000141257	ENSDARG00000087197	ros1	exon	4
chr17	ENSDART00000104874	ENSDARG00000071082	p4ha1b	exon	4
chr17	ENSDART00000079011	ENSDARG00000056491	ikzf5	exon	4
chr17	ENSDART00000087565	ENSDARG00000061405	fam176a	exon	4
chr17	ENSDART00000075529	ENSDARG00000027984	GSTZ1	exon	4
chr2	ENSDART00000056453	ENSDARG00000038666	igfbp1b	exon	4
chr2	ENSDART00000112030	ENSDARG00000078690	SIRT5	exon	4
chr22	ENSDART00000063574	ENSDARG00000043303	zgc:113336	exon	4
chr1	ENSDART00000114903	ENSDARG00000057303	galnt7	exon	4
chr1	ENSDART00000052272	ENSDARG00000036008	caly	exon	4
chr1	ENSDART00000136378	ENSDARG00000031952	mb	exon	4
chr23	ENSDART00000053546	ENSDARG00000036878	sh3bgrl2	exon	4
chr23	ENSDART00000035031	ENSDARG00000025522	sgk1	exon	4
chr23	ENSDART00000149422	ENSDARG00000095861	HMGN5	exon	4
chr16	ENSDART00000114864	ENSDARG00000075719	C1S (2 of 2)	exon	4
chr13	ENSDART00000125156	ENSDARG00000087977	CU611056.1	exon	4
chr13	ENSDART00000059321	ENSDARG00000040534	EPCAM	exon	4
chr25	ENSDART00000109358	ENSDARG00000077024	uba2	exon	4
chr25	ENSDART00000103470	ENSDARG00000070474	arid3b	exon	4
chr6	ENSDART00000112146	ENSDARG00000075296	FAM83C	exon	4
chr3	ENSDART00000108663	ENSDARG00000081299	si:ch211-152f6.6	exon	4
chr3	ENSDART00000132732	ENSDARG00000038296	tmem86b	exon	4
chr3	ENSDART00000041388	ENSDARG00000032565	cacng2a	exon	4
chr3	ENSDART00000084689	ENSDARG00000060246	slc16a6b	exon	4
chr3	ENSDART00000009411	ENSDARG00000017084	bud31	exon	4
chr3	ENSDART00000013376	ENSDARG00000012192	cant1a	exon	4
chr9	ENSDART00000142726	ENSDARG00000000666	creg2	exon	4
chr9	ENSDART00000125824	ENSDARG00000042115	tmem198a	exon	4
chr20	ENSDART00000022060	ENSDARG00000007823	atf3	exon	4
chr14	ENSDART00000130792	ENSDARG00000089498	GM2A (2 of 2)	exon	4
chr15	ENSDART00000018514	ENSDARG00000002336	dlc	exon	4
chr8	ENSDART00000132657	ENSDARG00000034457	C8H1orf194	exon	4
chr8	ENSDART00000131660	ENSDARG00000068369	angptl2	exon	4
chr4	ENSDART00000134417	ENSDARG00000020812	CD22 (16 of 39)	exon	4
chr24	ENSDART00000000070	ENSDARG00000000069	dap	exon	4
chr24	ENSDART00000137293	ENSDARG00000055629	C24H3orf58 (2 of 2)	exon	4
chr19	ENSDART00000004375	ENSDARG00000020455	si:ch211-171h4.3	exon	4
chr5	ENSDART00000099602	ENSDARG00000027141	ube2l3b	exon	4
chr5	ENSDART00000060532	ENSDARG00000041299	zgc:110796	exon	4
chr2	ENSDART00000123041	ENSDARG00000087773	TNS3 (1 of 3)	exon	5
chr2	ENSDART00000018818	ENSDARG00000021398	mul1a	exon	5
chr22	ENSDART00000129240	ENSDARG00000079762	si:dkey-253d23.4	exon	5
chr1	ENSDART00000054925	ENSDARG00000037713	pcnp	exon	5
chr23	ENSDART00000044301	ENSDARG00000009079	si:ch211-224l10.5	exon	5
chr16	ENSDART00000122111	ENSDARG00000088881	si:dkeyp-69b9.3	exon	5
chr16	ENSDART00000146564	ENSDARG00000095533	si:ch211-198c19.3	exon	5
chr13	ENSDART00000133306	ENSDARG00000092462	si:dkey-112g5.5	exon	5
chr6	ENSDART00000128985	ENSDARG00000007231	ryk	exon	5
chr3	ENSDART00000043190	ENSDARG00000028848	LSM12 (2 of 2)	exon	5
chr9	ENSDART00000139198	ENSDARG00000090389	NDUFV3 (2 of 2)	exon	5
chr9	ENSDART00000143217	ENSDARG00000093452	si:rp71-68n21.11	exon	5
chr12	ENSDART00000123533	ENSDARG00000091503	FADS6	exon	5
chr12	ENSDART00000126661	ENSDARG00000079468	RHOBTB1	exon	5
chr20	ENSDART00000006443	ENSDARG00000011000	gtf2a1	exon	5
chr20	ENSDART00000027603	ENSDARG00000043257	ckbb	exon	5
chr14	ENSDART00000088484	ENSDARG00000061764	ahnak	exon	5
chr14	ENSDART00000125788	ENSDARG00000034344	pcdh19	exon	5
chr15	ENSDART00000114134	ENSDARG00000074271	wrb	exon	5
chr8	ENSDART00000016696	ENSDARG00000018328	rhoad	exon	5
chr4	ENSDART00000142117	ENSDARG00000069160	fam19a5	exon	5
chr24	ENSDART00000141414	ENSDARG00000038556	C24H8orf33	exon	5
chr24	ENSDART00000141414	ENSDARG00000038556	C24H8orf33	exon	5
chr19	ENSDART00000053503	ENSDARG00000036851	zgc:158374	exon	5
chr19	ENSDART00000110456	ENSDARG00000076892	nme2b.2	exon	5
chr19	ENSDART00000110456	ENSDARG00000076892	nme2b.2	exon	5
chr5	ENSDART00000031665	ENSDARG00000026726	anxa1a	exon	5
chr11	ENSDART00000113096	ENSDARG00000074565	PUSL1	exon	6
chr21	ENSDART00000126570	ENSDARG00000091512	NFRKB	exon	6
chr21	ENSDART00000122480	ENSDARG00000012953	mob1bb	exon	6
chr7	ENSDART00000123203	ENSDARG00000030241	vbp1	exon	6
chr7	ENSDART00000035710	ENSDARG00000027322	lin7c	exon	6
chr22	ENSDART00000135604	ENSDARG00000062402	frem1b	exon	6
chr1	ENSDART00000100869	ENSDARG00000069360	ppp3r1b	exon	6
chr18	ENSDART00000099184	ENSDARG00000091790	si:ch211-203b20.4	exon	6
chr23	ENSDART00000144903	ENSDARG00000039263	zbtb48	exon	6
chr16	ENSDART00000147616	ENSDARG00000054814	si:ch211-251p5.5	exon	6
chr6	ENSDART00000129202	ENSDARG00000010873	DDX17	exon	6
chr3	ENSDART00000147322	ENSDARG00000038059	grb2b	exon	6
chr3	ENSDART00000019004	ENSDARG00000004034	arhgdig	exon	6
chr3	ENSDART00000126588	ENSDARG00000090062	rac3a	exon	6
chr3	ENSDART00000033538	ENSDARG00000025086	fn3krp	exon	6
chr9	ENSDART00000018228	ENSDARG00000017803	gsk3b	exon	6
chr15	ENSDART00000061139	ENSDARG00000041715	bco2b	exon	6
chr15	ENSDART00000035096	ENSDARG00000019949	hsp47	exon	6
chr8	ENSDART00000114177	ENSDARG00000074889	mutyh	exon	6
chr8	ENSDART00000132632	ENSDARG00000056091	cttnbp2nl	exon	6
chr8	ENSDART00000123106	ENSDARG00000074922	BX927193.1	exon	6
chr4	ENSDART00000041289	ENSDARG00000033179	C4H7orf23 (1 of 2)	exon	6
chr10	ENSDART00000064393	ENSDARG00000043857	ufm1	exon	6
chr5	ENSDART00000135921	ENSDARG00000035633	TCTN2	exon	6
chr5	ENSDART00000010041	ENSDARG00000004251	dhfr	exon	6
chr5	ENSDART00000146285	ENSDARG00000056281	cybasc3a	exon	6
chr5	ENSDART00000074261	ENSDARG00000052411	si:dkey-71l1.1	exon	6
chr21	ENSDART00000111713	ENSDARG00000077547	tmlhe	exon	7
chr2	ENSDART00000081094	ENSDARG00000058267	glmna	exon	7
chr2	ENSDART00000127004	ENSDARG00000003470	slc25a42	exon	7
chr2	ENSDART00000037698	ENSDARG00000022213	uck2b	exon	7
chr2	ENSDART00000037698	ENSDARG00000022213	uck2b	exon	7
chr22	ENSDART00000092647	ENSDARG00000063412	CERS1	exon	7
chr1	ENSDART00000087658	ENSDARG00000061451	n4bp2	exon	7
chr1	ENSDART00000148251	ENSDARG00000093237	si:ch211-89o9.4	exon	7
chr1	ENSDART00000109756	ENSDARG00000077688	cpo	exon	7
chr16	ENSDART00000135860	ENSDARG00000073918	rnf41l	exon	7
chr13	ENSDART00000109546	ENSDARG00000033327	unc5b	exon	7
chr25	ENSDART00000024633	ENSDARG00000009299	DUSP8 (1 of 2)	exon	7
chr25	ENSDART00000061996	ENSDARG00000042272	tmem231	exon	7
chr6	ENSDART00000090065	ENSDARG00000074921	FAM117B (2 of 2)	exon	7
chr6	ENSDART00000112344	ENSDARG00000078210	TULP1 (1 of 2)	exon	7
chr9	ENSDART00000148764	ENSDARG00000053498	ednrb1b	exon	7
chr12	ENSDART00000050074	ENSDARG00000015179	mfsd8	exon	7
chr12	ENSDART00000145221	ENSDARG00000054201	rnf40	exon	7
chr20	ENSDART00000021575	ENSDARG00000005595	adgb	exon	7
chr14	ENSDART00000123178	ENSDARG00000004926	slbp	exon	7
chr8	ENSDART00000002186	ENSDARG00000006074	uck2a	exon	7
chr19	ENSDART00000080897	ENSDARG00000058089	rprd2a	exon	7
chr5	ENSDART00000098590	ENSDARG00000056281	cybasc3a	exon	7
chr5	ENSDART00000148213	ENSDARG00000054433	yipf6	exon	7
chr11	ENSDART00000092270	ENSDARG00000063254	R3HDM4	exon	8
chr21	ENSDART00000112550	ENSDARG00000077364	mapk9	exon	8
chr17	ENSDART00000038730	ENSDARG00000043799	KLHL29 (1 of 2)	exon	8
chr1	ENSDART00000103724	ENSDARG00000033928	NDFIP2	exon	8
chr18	ENSDART00000078410	ENSDARG00000055994	v2rh1	exon	8
chr18	ENSDART00000127496	ENSDARG00000054451	loxl1	exon	8
chr23	ENSDART00000146096	ENSDARG00000095321	si:dkey-9l20.3	exon	8
chr25	ENSDART00000088249	ENSDARG00000074419	hcn4l	exon	8
chr3	ENSDART00000123630	ENSDARG00000037925	rgs9a	exon	8
chr9	ENSDART00000000250	ENSDARG00000000241	slc40a1	exon	8
chr12	ENSDART00000009319	ENSDARG00000004541	DNAI2 (2 of 2)	exon	8
chr20	ENSDART00000112848	ENSDARG00000078327	si:ch73-212j7.1	exon	8
chr15	ENSDART00000041677	ENSDARG00000029353	serpine2	exon	8
chr8	ENSDART00000134794	ENSDARG00000021115	spata6	exon	8
chr24	ENSDART00000109221	ENSDARG00000079241	wdr90	exon	8
chr24	ENSDART00000066781	ENSDARG00000045414	elovl2	exon	8
chr19	ENSDART00000098145	ENSDARG00000068028	trps1	exon	8
chr5	ENSDART00000143446	ENSDARG00000035253	npr3	exon	8
chr7	ENSDART00000108473	ENSDARG00000075964	PLEKHG4	exon	9
chr1	ENSDART00000078271	ENSDARG00000055874	cpe	exon	9
chr18	ENSDART00000046891	ENSDARG00000030872	cetp	exon	9
chr16	ENSDART00000121648	ENSDARG00000021855	arnt	exon	9
chr6	ENSDART00000018498	ENSDARG00000016527	CU929258.1	exon	9
chr3	ENSDART00000025724	ENSDARG00000009313	NAPSA	exon	9
chr14	ENSDART00000138084	ENSDARG00000014244	rbmx	exon	9
chr8	ENSDART00000111321	ENSDARG00000079932	zgc:152830	exon	9
chr8	ENSDART00000060883	ENSDARG00000041530	ppih	exon	9
chr21	ENSDART00000114778	ENSDARG00000078335	amot	exon	10
chr7	ENSDART00000005884	ENSDARG00000002235	mmp14a	exon	10
chr17	ENSDART00000136059	ENSDARG00000060113	znf395a	exon	10
chr17	ENSDART00000122209	ENSDARG00000071018	ptena	exon	10
chr17	ENSDART00000147557	ENSDARG00000002353	TAGAP (2 of 2)	exon	10
chr2	ENSDART00000077720	ENSDARG00000055370	zgc:163121	exon	10
chr2	ENSDART00000056536	ENSDARG00000038713	TEP1	exon	10
chr16	ENSDART00000077998	ENSDARG00000055607	cgna	exon	10
chr13	ENSDART00000139589	ENSDARG00000070231	POLH	exon	10
chr25	ENSDART00000109358	ENSDARG00000077024	uba2	exon	10
chr6	ENSDART00000123576	ENSDARG00000086028	IGFN1 (3 of 3)	exon	10
chr12	ENSDART00000109521	ENSDARG00000076431	AL732629.1	exon	10
chr14	ENSDART00000149279	ENSDARG00000056800	med12	exon	10
chr15	ENSDART00000100108	ENSDARG00000054748	cuedc1b	exon	10
chr4	ENSDART00000108928	ENSDARG00000078745	pnpla8	exon	10
chr24	ENSDART00000149134	ENSDARG00000045401	mllt10	exon	10
chr24	ENSDART00000097722	ENSDARG00000078758	CABZ01063402.1	exon	10
chr7	ENSDART00000010124	ENSDARG00000075831	SLC7A8 (1 of 2)	exon	11
chr7	ENSDART00000073594	ENSDARG00000051886	ANKRD11	exon	11
chr7	ENSDART00000009888	ENSDARG00000018105	casq1b	exon	11
chr2	ENSDART00000005381	ENSDARG00000012325	GEN1	exon	11
chr2	ENSDART00000143203	ENSDARG00000079202	parp2	exon	11
chr1	ENSDART00000111686	ENSDARG00000074812	fhdc1	exon	11
chr18	ENSDART00000132249	ENSDARG00000026664	uri1	exon	11
chr23	ENSDART00000126299	ENSDARG00000056122	gdi1	exon	11
chr25	ENSDART00000114662	ENSDARG00000079983	zte25	exon	11
chr6	ENSDART00000128024	ENSDARG00000090418	WDSUB1	exon	11
chr6	ENSDART00000111855	ENSDARG00000076233	CHL1 (1 of 2)	exon	11
chr12	ENSDART00000111772	ENSDARG00000073810	thbs2b	exon	11
chr4	ENSDART00000013313	ENSDARG00000002174	itfg2	exon	11
chr24	ENSDART00000139299	ENSDARG00000095034	C24H8orf34	exon	11
chr5	ENSDART00000143492	ENSDARG00000095538	senp3a	exon	11
chr11	ENSDART00000030921	ENSDARG00000028721	mapk14b	exon	12
chr7	ENSDART00000084090	ENSDARG00000060023	ncapg2	exon	12
chr17	ENSDART00000035152	ENSDARG00000015016	KIF26A (1 of 2)	exon	12
chr22	ENSDART00000083879	ENSDARG00000012790	tmem161a	exon	12
chr1	ENSDART00000134470	ENSDARG00000074812	fhdc1	exon	12
chr23	ENSDART00000115189	ENSDARG00000036864	slc34a2b	exon	12
chr23	ENSDART00000018301	ENSDARG00000006353	itga5	exon	12
chr13	ENSDART00000015154	ENSDARG00000012141	papolg	exon	12
chr13	ENSDART00000109546	ENSDARG00000033327	unc5b	exon	12
chr25	ENSDART00000104659	ENSDARG00000070986	sergef	exon	12
chr6	ENSDART00000074605	ENSDARG00000052705	pkp1	exon	12
chr3	ENSDART00000006602	ENSDARG00000032344	PDE4A	exon	12
chr9	ENSDART00000044314	ENSDARG00000006314	itgav	exon	12
chr20	ENSDART00000050559	ENSDARG00000070470	SH3RF1	exon	12
chr20	ENSDART00000041444	ENSDARG00000032838	si:dkey-206f10.1	exon	12
chr20	ENSDART00000138818	ENSDARG00000092503	arid1b	exon	12
chr14	ENSDART00000114684	ENSDARG00000074358	CPXM1 (1 of 2)	exon	12
chr15	ENSDART00000149703	ENSDARG00000059035	POR (2 of 2)	exon	12
chr15	ENSDART00000048847	ENSDARG00000031976	nos2b	exon	12
chr24	ENSDART00000015391	ENSDARG00000019342	chrnd	exon	12
chr24	ENSDART00000130982	ENSDARG00000008790	ACTR3B	exon	12
chr5	ENSDART00000142420	ENSDARG00000004587	KAT5 (1 of 2)	exon	12
chr11	ENSDART00000062237	ENSDARG00000042444	ankrd13c	exon	13
chr17	ENSDART00000075514	ENSDARG00000053481	ENTPD5 (1 of 2)	exon	13
chr22	ENSDART00000145769	ENSDARG00000061757	si:ch211-197g15.12	exon	13
chr23	ENSDART00000030004	ENSDARG00000069904	CABZ01071903.1	exon	13
chr16	ENSDART00000133310	ENSDARG00000060469	pik3r4	exon	13
chr25	ENSDART00000032825	ENSDARG00000019649	sept7b	exon	13
chr25	ENSDART00000032825	ENSDARG00000019649	sept7b	exon	13
chr6	ENSDART00000073789	ENSDARG00000052046	si:dkey-44g17.5	exon	13
chr12	ENSDART00000034550	ENSDARG00000023920	llgl2	exon	13
chr24	ENSDART00000099869	ENSDARG00000090106	SLC17A7 (2 of 2)	exon	13
chr11	ENSDART00000115249	ENSDARG00000077988	ABCC10	exon	14
chr21	ENSDART00000100310	ENSDARG00000069113	dbn1	exon	14
chr22	ENSDART00000128397	ENSDARG00000002909	tjp3	exon	14
chr6	ENSDART00000098906	ENSDARG00000068397	TENC1 (2 of 2)	exon	14
chr3	ENSDART00000109621	ENSDARG00000074086	TECPR1 (2 of 2)	exon	14
chr3	ENSDART00000082000	ENSDARG00000059002	CABZ01080098.1	exon	14
chr9	ENSDART00000046903	ENSDARG00000034801	MYLK (2 of 2)	exon	14
chr5	ENSDART00000130355	ENSDARG00000026925	nos2a	exon	14
chr21	ENSDART00000141607	ENSDARG00000044809	fpgs	exon	15
chr7	ENSDART00000148430	ENSDARG00000016141	slc6a2	exon	15
chr18	ENSDART00000125382	ENSDARG00000011830	fgd4a	exon	15
chr18	ENSDART00000127814	ENSDARG00000041581	znf143b	exon	15
chr23	ENSDART00000035755	ENSDARG00000010515	dvl1a	exon	15
chr13	ENSDART00000003706	ENSDARG00000009160	kmo	exon	15
chr25	ENSDART00000022861	ENSDARG00000007950	itga11b	exon	15
chr20	ENSDART00000040292	ENSDARG00000027649	cpsf3	exon	15
chr20	ENSDART00000113649	ENSDARG00000077187	impg1a	exon	15
chr14	ENSDART00000127594	ENSDARG00000042236	atrx	exon	15
chr14	ENSDART00000091739	ENSDARG00000063036	PSD2	exon	15
chr8	ENSDART00000124809	ENSDARG00000004094	acsbg2	exon	15
chr21	ENSDART00000016167	ENSDARG00000018738	zw10	exon	16
chr7	ENSDART00000101188	ENSDARG00000069489	exoc6b	exon	16
chr7	ENSDART00000098503	ENSDARG00000068210	haus6	exon	16
chr7	ENSDART00000149680	ENSDARG00000005800	ampd3a	exon	16
chr7	ENSDART00000149680	ENSDARG00000005800	ampd3a	exon	16
chr1	ENSDART00000054833	ENSDARG00000037646	rgs11	exon	16
chr6	ENSDART00000091836	ENSDARG00000063062	ubn2	exon	16
chr20	ENSDART00000062904	ENSDARG00000042859	SLC5A6 (1 of 2)	exon	16
chr15	ENSDART00000101718	ENSDARG00000069742	cul5a	exon	16
chr8	ENSDART00000141634	ENSDARG00000055302	grid2	exon	16
chr5	ENSDART00000010101	ENSDARG00000012468	aacs	exon	16
chr11	ENSDART00000122918	ENSDARG00000076120	foxp4	exon	17
chr11	ENSDART00000045971	ENSDARG00000003877	CR450797.1	exon	17
chr21	ENSDART00000028007	ENSDARG00000006524	supt6h	exon	17
chr21	ENSDART00000138278	ENSDARG00000044808	slc4a4b	exon	17
chr22	ENSDART00000091777	ENSDARG00000063051	bap1	exon	17
chr18	ENSDART00000079824	ENSDARG00000057218	tbc1d15	exon	17
chr23	ENSDART00000035865	ENSDARG00000013838	sulf2l	exon	17
chr3	ENSDART00000111435	ENSDARG00000075139	HDAC5	exon	17
chr12	ENSDART00000055604	ENSDARG00000038138	si:dkeyp-94b4.1	exon	17
chr14	ENSDART00000110004	ENSDARG00000074865	FRMPD3	exon	17
chr15	ENSDART00000079647	ENSDARG00000057052	DSCAML1	exon	17
chr8	ENSDART00000114194	ENSDARG00000077696	FAM188B	exon	17
chr24	ENSDART00000111237	ENSDARG00000074708	ARMC3	exon	17
chr21	ENSDART00000134592	ENSDARG00000017312	lmbrd2b	exon	18
chr21	ENSDART00000101136	ENSDARG00000069467	igsf9bb	exon	18
chr22	ENSDART00000015103	ENSDARG00000015749	hps3	exon	18
chr23	ENSDART00000026865	ENSDARG00000014828	l3mbtl1a	exon	18
chr16	ENSDART00000081407	ENSDARG00000058528	cnot10	exon	18
chr3	ENSDART00000111948	ENSDARG00000076052	SEZ6L2	exon	18
chr12	ENSDART00000093113	ENSDARG00000063612	antxr1	exon	18
chr19	ENSDART00000088427	ENSDARG00000061752	fam65b	exon	18
chr19	ENSDART00000035093	ENSDARG00000024492	col9a2	exon	18
chr19	ENSDART00000039415	ENSDARG00000020323	NUP153	exon	18
chr13	ENSDART00000016602	ENSDARG00000007561	CDH23	exon	19
chr25	ENSDART00000112588	ENSDARG00000079374	TJP1 (2 of 2)	exon	19
chr3	ENSDART00000132190	ENSDARG00000056258	cdc27	exon	19
chr9	ENSDART00000132123	ENSDARG00000095022	thsd7ba	exon	19
chr24	ENSDART00000110241	ENSDARG00000074480	cnksr2	exon	19
chr19	ENSDART00000127812	ENSDARG00000062543	map7d1b	exon	19
chr19	ENSDART00000127812	ENSDARG00000062543	map7d1b	exon	19
chr21	ENSDART00000100286	ENSDARG00000069105	fgfr4	exon	20
chr17	ENSDART00000086201	ENSDARG00000029482	ush2a	exon	20
chr2	ENSDART00000132651	ENSDARG00000061490	u2surp	exon	20
chr22	ENSDART00000105101	ENSDARG00000055592	capn2b	exon	20
chr23	ENSDART00000134012	ENSDARG00000059987	dnah12	exon	20
chr17	ENSDART00000130080	ENSDARG00000021896	asap3	exon	21
chr22	ENSDART00000111318	ENSDARG00000011281	osbpl1a	exon	21
chr22	ENSDART00000112234	ENSDARG00000078752	si:ch1073-280h16.1	exon	21
chr16	ENSDART00000018213	ENSDARG00000018750	npr1b	exon	21
chr9	ENSDART00000061062	ENSDARG00000034555	PARD3B (1 of 2)	exon	21
chr7	ENSDART00000109511	ENSDARG00000078088	CR339051.1	exon	22
chr18	ENSDART00000055678	ENSDARG00000038188	RELN (2 of 2)	exon	22
chr14	ENSDART00000014159	ENSDARG00000015247	f8	exon	23
chr17	ENSDART00000024726	ENSDARG00000015059	daam1a	exon	24
chr2	ENSDART00000058281	ENSDARG00000022615	si:ch211-241e1.3	exon	24
chr12	ENSDART00000109164	ENSDARG00000079004	TANC2 (2 of 2)	exon	24
chr1	ENSDART00000058876	ENSDARG00000040245	kpnb3	exon	26
chr13	ENSDART00000132691	ENSDARG00000059832	bai3	exon	26
chr6	ENSDART00000090994	ENSDARG00000062744	scn1lab	exon	26
chr13	ENSDART00000090475	ENSDARG00000062532	fam21c	exon	27
chr12	ENSDART00000109164	ENSDARG00000079004	TANC2 (2 of 2)	exon	27
chr16	ENSDART00000018091	ENSDARG00000016573	heatr7a	exon	28
chr19	ENSDART00000110699	ENSDARG00000002880	CCDC132 (1 of 2)	exon	28
chr4	ENSDART00000127299	ENSDARG00000076624	ptprb	exon	29
chr16	ENSDART00000059038	ENSDARG00000078717	itga8	exon	30
chr19	ENSDART00000127517	ENSDARG00000091116	pkhd1l1	exon	31
chr1	ENSDART00000124833	ENSDARG00000052480	pdcd11	exon	32
chr9	ENSDART00000131488	ENSDARG00000093661	MAP4K4	exon	32
chr17	ENSDART00000088179	ENSDARG00000043746	nrxn3a	exon	33
chr25	ENSDART00000028997	ENSDARG00000073843	MYO9A (2 of 2)	exon	33
chr25	ENSDART00000123330	ENSDARG00000039133	lamb4	exon	34
chr7	ENSDART00000147287	ENSDARG00000043313	ank2b	exon	37
chr13	ENSDART00000075522	ENSDARG00000053484	syne2b	exon	55
chr2	ENSDART00000112279	ENSDARG00000075560	mll3b	exon	60
chr23	ENSDART00000146990	ENSDARG00000016782	huwe1	exon	63
chr22	ENSDART00000092050	ENSDARG00000076484	stab1l	exon	69
chr1	ENSDART00000141317	ENSDARG00000000606	dnah7l	exon	69
chr9	ENSDART00000126871	ENSDARG00000028213	ttna	exon	133
chr9	ENSDART00000109099	ENSDARG00000028213	ttna	exon	175
chr11	ENSDART00000115255	ENSDARG00000079742	MCF2L2	intron	1
chr11	ENSDART00000025016	ENSDARG00000036840	krt15	intron	1
chr11	ENSDART00000025016	ENSDARG00000036840	krt15	intron	1
chr11	ENSDART00000025016	ENSDARG00000036840	krt15	intron	1
chr11	ENSDART00000025016	ENSDARG00000036840	krt15	intron	1
chr11	ENSDART00000104143	ENSDARG00000001969	txlng	intron	1
chr11	ENSDART00000121872	ENSDARG00000086505	MAST3 (1 of 2)	intron	1
chr11	ENSDART00000059752	ENSDARG00000040779	med16	intron	1
chr11	ENSDART00000102520	ENSDARG00000026882	palm	intron	1
chr11	ENSDART00000102520	ENSDARG00000026882	palm	intron	1
chr11	ENSDART00000128809	ENSDARG00000089083	itga7	intron	1
chr11	ENSDART00000112589	ENSDARG00000079740	EFNA2 (2 of 2)	intron	1
chr11	ENSDART00000027386	ENSDARG00000014138	acot8	intron	1
chr11	ENSDART00000112589	ENSDARG00000079740	EFNA2 (2 of 2)	intron	1
chr11	ENSDART00000112589	ENSDARG00000079740	EFNA2 (2 of 2)	intron	1
chr11	ENSDART00000112589	ENSDARG00000079740	EFNA2 (2 of 2)	intron	1
chr11	ENSDART00000002318	ENSDARG00000016783	srsf6b	intron	1
chr11	ENSDART00000129657	ENSDARG00000016405	hug	intron	1
chr11	ENSDART00000124968	ENSDARG00000009724	rpn2	intron	1
chr11	ENSDART00000066033	ENSDARG00000044924	gdf11	intron	1
chr11	ENSDART00000066033	ENSDARG00000044924	gdf11	intron	1
chr11	ENSDART00000066033	ENSDARG00000044924	gdf11	intron	1
chr11	ENSDART00000066033	ENSDARG00000044924	gdf11	intron	1
chr11	ENSDART00000124139	ENSDARG00000040238	pank4	intron	1
chr11	ENSDART00000090117	ENSDARG00000088837	CR631124.1	intron	1
chr11	ENSDART00000090401	ENSDARG00000062471	fam19a4b	intron	1
chr11	ENSDART00000122078	ENSDARG00000057940	dido1	intron	1
chr11	ENSDART00000122078	ENSDARG00000057940	dido1	intron	1
chr11	ENSDART00000122078	ENSDARG00000057940	dido1	intron	1
chr11	ENSDART00000040235	ENSDARG00000007601	zmynd8	intron	1
chr11	ENSDART00000044423	ENSDARG00000003169	magi1b	intron	1
chr11	ENSDART00000044423	ENSDARG00000003169	magi1b	intron	1
chr11	ENSDART00000054744	ENSDARG00000037593	prickle2	intron	1
chr11	ENSDART00000097934	ENSDARG00000015002	CDH4	intron	1
chr11	ENSDART00000045391	ENSDARG00000032161	srgap2a	intron	1
chr11	ENSDART00000122136	ENSDARG00000089564	CR853302.1	intron	1
chr11	ENSDART00000046122	ENSDARG00000044902	atp2b4	intron	1
chr11	ENSDART00000125272	ENSDARG00000090820	slc2a10	intron	1
chr11	ENSDART00000129854	ENSDARG00000090821	tp53rk	intron	1
chr11	ENSDART00000086720	ENSDARG00000061099	nfasca	intron	1
chr11	ENSDART00000036513	ENSDARG00000016200	trib3	intron	1
chr11	ENSDART00000128309	ENSDARG00000009754	C11H12orf50	intron	1
chr11	ENSDART00000103752	ENSDARG00000055552	dvl1b	intron	1
chr11	ENSDART00000089713	ENSDARG00000062222	mxra8a	intron	1
chr11	ENSDART00000145217	ENSDARG00000070571	C11H1orf106 (2 of 2)	intron	1
chr11	ENSDART00000087740	ENSDARG00000070571	C11H1orf106 (2 of 2)	intron	1
chr11	ENSDART00000141730	ENSDARG00000002690	rabif	intron	1
chr11	ENSDART00000008038	ENSDARG00000018423	sulf2	intron	1
chr11	ENSDART00000008038	ENSDARG00000018423	sulf2	intron	1
chr11	ENSDART00000065949	ENSDARG00000070545	top1l	intron	1
chr11	ENSDART00000014945	ENSDARG00000015990	hcfc1a	intron	1
chr11	ENSDART00000035602	ENSDARG00000025718	cxxc1	intron	1
chr11	ENSDART00000140856	ENSDARG00000032856	ccdc120	intron	1
chr11	ENSDART00000103549	ENSDARG00000008034	skib	intron	1
chr11	ENSDART00000103549	ENSDARG00000008034	skib	intron	1
chr11	ENSDART00000103549	ENSDARG00000008034	skib	intron	1
chr11	ENSDART00000030921	ENSDARG00000028721	mapk14b	intron	1
chr11	ENSDART00000103513	ENSDARG00000075536	cpne1	intron	1
chr11	ENSDART00000023823	ENSDARG00000006775	CASS4	intron	1
chr11	ENSDART00000043756	ENSDARG00000021539	ephb2b	intron	1
chr11	ENSDART00000065853	ENSDARG00000044803	dhrs3b	intron	1
chr11	ENSDART00000065853	ENSDARG00000044803	dhrs3b	intron	1
chr11	ENSDART00000126071	ENSDARG00000070919	cpne5	intron	1
chr11	ENSDART00000067822	ENSDARG00000046132	dynlt3	intron	1
chr11	ENSDART00000079149	ENSDARG00000056618	xk	intron	1
chr11	ENSDART00000124830	ENSDARG00000070416	zgc:162816	intron	1
chr11	ENSDART00000121861	ENSDARG00000028306	prph	intron	1
chr11	ENSDART00000147426	ENSDARG00000045017	PDRG1	intron	1
chr11	ENSDART00000146944	ENSDARG00000027065	zgc:165543	intron	1
chr11	ENSDART00000009788	ENSDARG00000005699	ddx19	intron	1
chr11	ENSDART00000031441	ENSDARG00000055373	sema3fb	intron	1
chr11	ENSDART00000031441	ENSDARG00000055373	sema3fb	intron	1
chr11	ENSDART00000124110	ENSDARG00000090301	usp48	intron	1
chr11	ENSDART00000115294	ENSDARG00000077942	NINJ1	intron	1
chr11	ENSDART00000099351	ENSDARG00000068636	ppp1r26	intron	1
chr11	ENSDART00000099351	ENSDARG00000068636	ppp1r26	intron	1
chr11	ENSDART00000102870	ENSDARG00000070214	slc41a1	intron	1
chr11	ENSDART00000041800	ENSDARG00000023609	epha8	intron	1
chr11	ENSDART00000125119	ENSDARG00000086851	CR762484.2	intron	1
chr11	ENSDART00000124068	ENSDARG00000091353	CR759952.1	intron	1
chr11	ENSDART00000055709	ENSDARG00000038205	her2	intron	1
chr11	ENSDART00000042599	ENSDARG00000030239	fam116aa	intron	1
chr11	ENSDART00000089963	ENSDARG00000074210	zgc:110286	intron	1
chr11	ENSDART00000067608	ENSDARG00000030964	pde12	intron	1
chr11	ENSDART00000098677	ENSDARG00000038843	il17rd	intron	1
chr11	ENSDART00000098677	ENSDARG00000038843	il17rd	intron	1
chr11	ENSDART00000098677	ENSDARG00000038843	il17rd	intron	1
chr11	ENSDART00000085724	ENSDARG00000060675	NID1 (2 of 2)	intron	1
chr11	ENSDART00000085724	ENSDARG00000060675	NID1 (2 of 2)	intron	1
chr11	ENSDART00000085724	ENSDARG00000060675	NID1 (2 of 2)	intron	1
chr11	ENSDART00000039490	ENSDARG00000022728	rbm34	intron	1
chr11	ENSDART00000062269	ENSDARG00000042468	sos1	intron	1
chr11	ENSDART00000062269	ENSDARG00000042468	sos1	intron	1
chr11	ENSDART00000023116	ENSDARG00000004342	srsf11	intron	1
chr11	ENSDART00000092552	ENSDARG00000045006	ptprga	intron	1
chr11	ENSDART00000027850	ENSDARG00000011945	slc35e1	intron	1
chr11	ENSDART00000122133	ENSDARG00000086655	undef	intron	1
chr11	ENSDART00000126084	ENSDARG00000089646	BX323045.2	intron	1
chr11	ENSDART00000123601	ENSDARG00000076074	dda1	intron	1
chr11	ENSDART00000022526	ENSDARG00000018650	gtpbp3	intron	1
chr11	ENSDART00000027666	ENSDARG00000003165	nr2f6b	intron	1
chr11	ENSDART00000027666	ENSDARG00000003165	nr2f6b	intron	1
chr11	ENSDART00000082223	ENSDARG00000059177	tax1bp3	intron	1
chr11	ENSDART00000012789	ENSDARG00000010096	slc1a6	intron	1
chr11	ENSDART00000002459	ENSDARG00000008890	ctns	intron	1
chr11	ENSDART00000139454	ENSDARG00000002411	pde4cb	intron	1
chr11	ENSDART00000139454	ENSDARG00000002411	pde4cb	intron	1
chr11	ENSDART00000016472	ENSDARG00000018260	bmp7a	intron	1
chr11	ENSDART00000102293	ENSDARG00000069977	C11H12orf10	intron	1
chr11	ENSDART00000126523	ENSDARG00000058696	TBL1XR1	intron	1
chr21	ENSDART00000141297	ENSDARG00000058693	cast	intron	1
chr21	ENSDART00000081652	ENSDARG00000058725	rfesd	intron	1
chr21	ENSDART00000136103	ENSDARG00000088318	ubap2	intron	1
chr21	ENSDART00000114524	ENSDARG00000012820	nop56	intron	1
chr21	ENSDART00000024616	ENSDARG00000016396	fam219a	intron	1
chr21	ENSDART00000102251	ENSDARG00000019231	spna2	intron	1
chr21	ENSDART00000142569	ENSDARG00000042232	specc1lb	intron	1
chr21	ENSDART00000130407	ENSDARG00000076283	snrpd3l	intron	1
chr21	ENSDART00000102197	ENSDARG00000062970	fam129ba	intron	1
chr21	ENSDART00000015629	ENSDARG00000001994	stxbp1a	intron	1
chr21	ENSDART00000134278	ENSDARG00000045567	phpt1	intron	1
chr21	ENSDART00000143113	ENSDARG00000005980	sfswap	intron	1
chr21	ENSDART00000149126	ENSDARG00000044752	p2rx4a	intron	1
chr21	ENSDART00000026903	ENSDARG00000001769	ptpra	intron	1
chr21	ENSDART00000113899	ENSDARG00000076552	zgc:193801	intron	1
chr21	ENSDART00000113899	ENSDARG00000076552	zgc:193801	intron	1
chr21	ENSDART00000101241	ENSDARG00000069518	aqp3b	intron	1
chr21	ENSDART00000124173	ENSDARG00000057737	rxraa	intron	1
chr21	ENSDART00000142468	ENSDARG00000038788	DNAI1 (1 of 2)	intron	1
chr21	ENSDART00000135239	ENSDARG00000006527	brd3a	intron	1
chr21	ENSDART00000136084	ENSDARG00000079104	mfhas1	intron	1
chr21	ENSDART00000115236	ENSDARG00000078113	atp5ia	intron	1
chr21	ENSDART00000145261	ENSDARG00000093907	si:dkey-246j23.6	intron	1
chr21	ENSDART00000145261	ENSDARG00000093907	si:dkey-246j23.6	intron	1
chr21	ENSDART00000145261	ENSDARG00000093907	si:dkey-246j23.6	intron	1
chr21	ENSDART00000145261	ENSDARG00000093907	si:dkey-246j23.6	intron	1
chr21	ENSDART00000145261	ENSDARG00000093907	si:dkey-246j23.6	intron	1
chr21	ENSDART00000145261	ENSDARG00000093907	si:dkey-246j23.6	intron	1
chr21	ENSDART00000079692	ENSDARG00000057096	ndr1	intron	1
chr21	ENSDART00000014254	ENSDARG00000014956	DIABLO (2 of 2)	intron	1
chr21	ENSDART00000008099	ENSDARG00000017385	b9d2	intron	1
chr21	ENSDART00000101726	ENSDARG00000069745	slc35f2	intron	1
chr21	ENSDART00000101732	ENSDARG00000069748	capn5b	intron	1
chr21	ENSDART00000101732	ENSDARG00000069748	capn5b	intron	1
chr21	ENSDART00000101732	ENSDARG00000069748	capn5b	intron	1
chr21	ENSDART00000111150	ENSDARG00000044619	birc2	intron	1
chr21	ENSDART00000017229	ENSDARG00000056181	ncam1a	intron	1
chr21	ENSDART00000017229	ENSDARG00000056181	ncam1a	intron	1
chr21	ENSDART00000055677	ENSDARG00000074280	STARD4	intron	1
chr21	ENSDART00000145541	ENSDARG00000031075	cadm1a	intron	1
chr21	ENSDART00000016219	ENSDARG00000009771	ppme1	intron	1
chr21	ENSDART00000066692	ENSDARG00000045348	NUP54	intron	1
chr21	ENSDART00000139790	ENSDARG00000069494	tmem223	intron	1
chr21	ENSDART00000141149	ENSDARG00000069766	si:dkeyp-6a12.1	intron	1
chr21	ENSDART00000034875	ENSDARG00000024026	sdf2	intron	1
chr21	ENSDART00000028007	ENSDARG00000006524	supt6h	intron	1
chr21	ENSDART00000003001	ENSDARG00000006316	rpl23a	intron	1
chr21	ENSDART00000077200	ENSDARG00000054916	eif4ebp3	intron	1
chr21	ENSDART00000002767	ENSDARG00000069266	esrra	intron	1
chr21	ENSDART00000129035	ENSDARG00000055064	prdx5	intron	1
chr21	ENSDART00000077381	ENSDARG00000055076	nxf1	intron	1
chr21	ENSDART00000065397	ENSDARG00000044540	fkbp2	intron	1
chr21	ENSDART00000135052	ENSDARG00000055154	slc8a4a	intron	1
chr21	ENSDART00000111236	ENSDARG00000076885	zgc:171220	intron	1
chr21	ENSDART00000111236	ENSDARG00000076885	zgc:171220	intron	1
chr21	ENSDART00000111236	ENSDARG00000076885	zgc:171220	intron	1
chr21	ENSDART00000111236	ENSDARG00000076885	zgc:171220	intron	1
chr21	ENSDART00000065420	ENSDARG00000044556	pacs1	intron	1
chr21	ENSDART00000135117	ENSDARG00000095382	si:rp71-1h20.3	intron	1
chr21	ENSDART00000141629	ENSDARG00000061454	nrxn2a	intron	1
chr21	ENSDART00000098696	ENSDARG00000077818	nrg2a	intron	1
chr21	ENSDART00000098696	ENSDARG00000077818	nrg2a	intron	1
chr21	ENSDART00000132884	ENSDARG00000078865	cxxc5	intron	1
chr21	ENSDART00000005929	ENSDARG00000004988	ppp3ca	intron	1
chr21	ENSDART00000102731	ENSDARG00000022682	add1	intron	1
chr21	ENSDART00000013641	ENSDARG00000011317	ADRA1B (1 of 2)	intron	1
chr21	ENSDART00000066363	ENSDARG00000045127	FAM53C	intron	1
chr21	ENSDART00000101036	ENSDARG00000069421	grpel2	intron	1
chr21	ENSDART00000011572	ENSDARG00000016789	ALOX15B	intron	1
chr21	ENSDART00000135591	ENSDARG00000011171	ODZ2 (2 of 3)	intron	1
chr21	ENSDART00000031028	ENSDARG00000008255	cnot6	intron	1
chr21	ENSDART00000003962	ENSDARG00000007217	wdr55	intron	1
chr21	ENSDART00000065337	ENSDARG00000044491	KIF20A	intron	1
chr21	ENSDART00000099533	ENSDARG00000031475	mpp1	intron	1
chr21	ENSDART00000014708	ENSDARG00000008057	ndfip1l	intron	1
chr21	ENSDART00000100310	ENSDARG00000069113	dbn1	intron	1
chr21	ENSDART00000126335	ENSDARG00000054307	zgc:77151	intron	1
chr21	ENSDART00000009740	ENSDARG00000016858	smad7	intron	1
chr21	ENSDART00000085728	ENSDARG00000060661	KLF8	intron	1
chr21	ENSDART00000065143	ENSDARG00000044362	unc119b	intron	1
chr21	ENSDART00000110646	ENSDARG00000017843	srsf1b	intron	1
chr21	ENSDART00000139194	ENSDARG00000042555	dym	intron	1
chr21	ENSDART00000045124	ENSDARG00000032296	pomp	intron	1
chr21	ENSDART00000004686	ENSDARG00000003022	limk1b	intron	1
chr21	ENSDART00000110274	ENSDARG00000078581	crebrf	intron	1
chr21	ENSDART00000110274	ENSDARG00000078581	crebrf	intron	1
chr21	ENSDART00000100000	ENSDARG00000068989	gabra1	intron	1
chr21	ENSDART00000144747	ENSDARG00000094609	si:ch73-68b22.2	intron	1
chr21	ENSDART00000021037	ENSDARG00000004754	hspa4a	intron	1
chr21	ENSDART00000021037	ENSDARG00000004754	hspa4a	intron	1
chr21	ENSDART00000085039	ENSDARG00000060390	zgc:175288	intron	1
chr21	ENSDART00000065104	ENSDARG00000044327	TMEM185B	intron	1
chr21	ENSDART00000139008	ENSDARG00000093255	si:dkey-229d11.3	intron	1
chr21	ENSDART00000017176	ENSDARG00000016484	dkc1	intron	1
chr21	ENSDART00000017176	ENSDARG00000016484	dkc1	intron	1
chr21	ENSDART00000017176	ENSDARG00000016484	dkc1	intron	1
chr21	ENSDART00000099528	ENSDARG00000068732	spry4	intron	1
chr21	ENSDART00000075443	ENSDARG00000053404	PPP2CA (1 of 2)	intron	1
chr21	ENSDART00000048293	ENSDARG00000032768	irf1b	intron	1
chr21	ENSDART00000099265	ENSDARG00000094863	ddx46	intron	1
chr21	ENSDART00000147187	ENSDARG00000029905	phyhd1	intron	1
chr21	ENSDART00000043431	ENSDARG00000030022	nup188	intron	1
chr21	ENSDART00000067733	ENSDARG00000046071	C21H18orf25	intron	1
chr21	ENSDART00000065862	ENSDARG00000038219	FNBP1 (2 of 3)	intron	1
chr21	ENSDART00000114982	ENSDARG00000077540	f2rl1.2	intron	1
chr21	ENSDART00000011096	ENSDARG00000014480	nr6a1b	intron	1
chr21	ENSDART00000055328	ENSDARG00000037963	nek6	intron	1
chr21	ENSDART00000084378	ENSDARG00000060106	crb2a	intron	1
chr21	ENSDART00000127040	ENSDARG00000089389	UHRF2 (2 of 2)	intron	1
chr21	ENSDART00000134195	ENSDARG00000025747	mapk10	intron	1
chr21	ENSDART00000144506	ENSDARG00000073862	ptpn13	intron	1
chr7	ENSDART00000124732	ENSDARG00000006494	asb7	intron	1
chr7	ENSDART00000100722	ENSDARG00000069291	undef	intron	1
chr7	ENSDART00000058342	ENSDARG00000039884	IL16	intron	1
chr7	ENSDART00000113905	ENSDARG00000079672	EFTUD1	intron	1
chr7	ENSDART00000113905	ENSDARG00000079672	EFTUD1	intron	1
chr7	ENSDART00000052750	ENSDARG00000027903	ADAMTSL3	intron	1
chr7	ENSDART00000023301	ENSDARG00000013360	SH3GL3 (1 of 2)	intron	1
chr7	ENSDART00000101231	ENSDARG00000078060	syt7b	intron	1
chr7	ENSDART00000020542	ENSDARG00000016774	PLEKHO2	intron	1
chr7	ENSDART00000126011	ENSDARG00000086214	ntrk3b	intron	1
chr7	ENSDART00000130241	ENSDARG00000089426	nop10	intron	1
chr7	ENSDART00000144118	ENSDARG00000057323	e2f8	intron	1
chr7	ENSDART00000080834	ENSDARG00000058038	eml3	intron	1
chr7	ENSDART00000108938	ENSDARG00000078801	MSANTD1	intron	1
chr7	ENSDART00000078694	ENSDARG00000056233	TMEM179B (2 of 2)	intron	1
chr7	ENSDART00000012450	ENSDARG00000056184	dvl2	intron	1
chr7	ENSDART00000052871	ENSDARG00000036394	pop7	intron	1
chr7	ENSDART00000077483	ENSDARG00000055163	epo	intron	1
chr7	ENSDART00000077483	ENSDARG00000055163	epo	intron	1
chr7	ENSDART00000125284	ENSDARG00000077329	nlgn2a	intron	1
chr7	ENSDART00000027718	ENSDARG00000016260	fxr2	intron	1
chr7	ENSDART00000141389	ENSDARG00000069563	zgc:153151	intron	1
chr7	ENSDART00000149881	ENSDARG00000061411	whsc2	intron	1
chr7	ENSDART00000052805	ENSDARG00000036345	ftsjd1	intron	1
chr7	ENSDART00000111542	ENSDARG00000079900	shroom4	intron	1
chr7	ENSDART00000058913	ENSDARG00000092115	eif4a1a	intron	1
chr7	ENSDART00000058913	ENSDARG00000092115	eif4a1a	intron	1
chr7	ENSDART00000121698	ENSDARG00000056741	senp3b	intron	1
chr7	ENSDART00000101053	ENSDARG00000069430	tp53i11a	intron	1
chr7	ENSDART00000149426	ENSDARG00000019098	cd82a	intron	1
chr7	ENSDART00000134717	ENSDARG00000056656	tspan18a	intron	1
chr7	ENSDART00000079042	ENSDARG00000056557	copb1	intron	1
chr7	ENSDART00000054366	ENSDARG00000037362	scube2	intron	1
chr7	ENSDART00000150148	ENSDARG00000054423	slc7a6	intron	1
chr7	ENSDART00000011324	ENSDARG00000003872	ccdc102a	intron	1
chr7	ENSDART00000113998	ENSDARG00000073731	DOK4	intron	1
chr7	ENSDART00000075757	ENSDARG00000053685	GTF2A2	intron	1
chr7	ENSDART00000136555	ENSDARG00000017901	tln2	intron	1
chr7	ENSDART00000108782	ENSDARG00000074968	POLR2M	intron	1
chr7	ENSDART00000129385	ENSDARG00000053476	lipca	intron	1
chr7	ENSDART00000113467	ENSDARG00000076919	igdcc4	intron	1
chr7	ENSDART00000085419	ENSDARG00000060542	LGR4	intron	1
chr7	ENSDART00000130731	ENSDARG00000043170	NR1H3	intron	1
chr7	ENSDART00000024869	ENSDARG00000010586	tex9	intron	1
chr7	ENSDART00000100254	ENSDARG00000069090	atp6v0d1	intron	1
chr7	ENSDART00000064913	ENSDARG00000044216	fto	intron	1
chr7	ENSDART00000146202	ENSDARG00000026862	aktip	intron	1
chr7	ENSDART00000027807	ENSDARG00000074498	chd9	intron	1
chr7	ENSDART00000027807	ENSDARG00000074498	chd9	intron	1
chr7	ENSDART00000027807	ENSDARG00000074498	chd9	intron	1
chr7	ENSDART00000084282	ENSDARG00000060071	PAPD5	intron	1
chr7	ENSDART00000137306	ENSDARG00000093196	si:ch73-335d12.1	intron	1
chr7	ENSDART00000150158	ENSDARG00000036066	si:dkey-78a14.4	intron	1
chr7	ENSDART00000010046	ENSDARG00000014577	rhpn2	intron	1
chr7	ENSDART00000052329	ENSDARG00000036043	ZNF408	intron	1
chr7	ENSDART00000052329	ENSDARG00000036043	ZNF408	intron	1
chr7	ENSDART00000037361	ENSDARG00000006878	phf21aa	intron	1
chr7	ENSDART00000024170	ENSDARG00000014439	dgkza	intron	1
chr7	ENSDART00000024170	ENSDARG00000014439	dgkza	intron	1
chr7	ENSDART00000100639	ENSDARG00000069254	chrm4a	intron	1
chr7	ENSDART00000146171	ENSDARG00000052244	zgc:158564	intron	1
chr7	ENSDART00000084179	ENSDARG00000060035	rnf32	intron	1
chr7	ENSDART00000013785	ENSDARG00000010658	insig1	intron	1
chr7	ENSDART00000074212	ENSDARG00000000861	scrib	intron	1
chr7	ENSDART00000051679	ENSDARG00000075083	PRKDC	intron	1
chr7	ENSDART00000006724	ENSDARG00000019969	smarcd3b	intron	1
chr7	ENSDART00000083929	ENSDARG00000059950	PLXDC2 (1 of 2)	intron	1
chr7	ENSDART00000083929	ENSDARG00000059950	PLXDC2 (1 of 2)	intron	1
chr7	ENSDART00000083929	ENSDARG00000059950	PLXDC2 (1 of 2)	intron	1
chr7	ENSDART00000083929	ENSDARG00000059950	PLXDC2 (1 of 2)	intron	1
chr7	ENSDART00000037850	ENSDARG00000035924	dync1li2	intron	1
chr7	ENSDART00000019270	ENSDARG00000011301	nae1	intron	1
chr7	ENSDART00000011823	ENSDARG00000003263	pop4	intron	1
chr7	ENSDART00000083514	ENSDARG00000059798	kcnq1	intron	1
chr7	ENSDART00000109147	ENSDARG00000077791	BRSK2 (1 of 2)	intron	1
chr7	ENSDART00000011082	ENSDARG00000012499	per1b	intron	1
chr7	ENSDART00000073827	ENSDARG00000052063	col4a5	intron	1
chr7	ENSDART00000130906	ENSDARG00000059672	ARHGAP36	intron	1
chr7	ENSDART00000082464	ENSDARG00000089066	NHSL2 (1 of 2)	intron	1
chr7	ENSDART00000109055	ENSDARG00000077769	CITED1	intron	1
chr7	ENSDART00000007767	ENSDARG00000005840	got2b	intron	1
chr7	ENSDART00000149828	ENSDARG00000035750	ccnd1	intron	1
chr7	ENSDART00000149828	ENSDARG00000035750	ccnd1	intron	1
chr7	ENSDART00000149828	ENSDARG00000035750	ccnd1	intron	1
chr7	ENSDART00000130987	ENSDARG00000035756	zgc:77702	intron	1
chr7	ENSDART00000060405	ENSDARG00000008937	neo1	intron	1
chr7	ENSDART00000060405	ENSDARG00000008937	neo1	intron	1
chr7	ENSDART00000060405	ENSDARG00000008937	neo1	intron	1
chr7	ENSDART00000097719	ENSDARG00000024371	cdh1	intron	1
chr7	ENSDART00000108646	ENSDARG00000076870	piezo1	intron	1
chr7	ENSDART00000098453	ENSDARG00000068191	cdh15	intron	1
chr7	ENSDART00000098453	ENSDARG00000068191	cdh15	intron	1
chr7	ENSDART00000124378	ENSDARG00000091803	CR382281.1	intron	1
chr7	ENSDART00000098997	ENSDARG00000079039	BX950862.5	intron	1
chr7	ENSDART00000098997	ENSDARG00000079039	BX950862.5	intron	1
chr7	ENSDART00000138188	ENSDARG00000051915	pde5ab	intron	1
chr7	ENSDART00000147287	ENSDARG00000043313	ank2b	intron	1
chr7	ENSDART00000147287	ENSDARG00000043313	ank2b	intron	1
chr7	ENSDART00000129798	ENSDARG00000017794	sdr16c5b	intron	1
chr7	ENSDART00000052331	ENSDARG00000036044	RPS20	intron	1
chr7	ENSDART00000052331	ENSDARG00000036044	RPS20	intron	1
chr7	ENSDART00000148038	ENSDARG00000078078	LRFN4 (1 of 2)	intron	1
chr7	ENSDART00000110671	ENSDARG00000079584	zgc:194930	intron	1
chr7	ENSDART00000148270	ENSDARG00000068258	lrch4	intron	1
chr7	ENSDART00000033316	ENSDARG00000027397	vangl2	intron	1
chr7	ENSDART00000033316	ENSDARG00000027397	vangl2	intron	1
chr7	ENSDART00000129200	ENSDARG00000090099	si:ch211-165f21.6	intron	1
chr7	ENSDART00000052005	ENSDARG00000035838	ostc	intron	1
chr7	ENSDART00000110837	ENSDARG00000076731	C7H2orf65	intron	1
chr7	ENSDART00000108471	ENSDARG00000035751	ipo7	intron	1
chr7	ENSDART00000104523	ENSDARG00000035732	arntl1b	intron	1
chr7	ENSDART00000097973	ENSDARG00000060346	zgc:162592	intron	1
chr7	ENSDART00000097973	ENSDARG00000060346	zgc:162592	intron	1
chr7	ENSDART00000024443	ENSDARG00000012764	CABZ01057488.1	intron	1
chr7	ENSDART00000081245	ENSDARG00000015392	dhx15	intron	1
chr7	ENSDART00000110330	ENSDARG00000078979	ARHGEF40	intron	1
chr7	ENSDART00000009888	ENSDARG00000018105	casq1b	intron	1
chr7	ENSDART00000114942	ENSDARG00000074491	HIST1H2BM (6 of 7)	intron	1
chr7	ENSDART00000113131	ENSDARG00000077639	INTU	intron	1
chr7	ENSDART00000102567	ENSDARG00000017504	CR457462.1	intron	1
chr7	ENSDART00000081620	ENSDARG00000058702	vax2	intron	1
chr17	ENSDART00000140391	ENSDARG00000005356	tyro3	intron	1
chr17	ENSDART00000113669	ENSDARG00000074323	efcab2	intron	1
chr17	ENSDART00000012670	ENSDARG00000015851	pnn	intron	1
chr17	ENSDART00000012670	ENSDARG00000015851	pnn	intron	1
chr17	ENSDART00000012670	ENSDARG00000015851	pnn	intron	1
chr17	ENSDART00000133710	ENSDARG00000015998	wdhd1	intron	1
chr17	ENSDART00000039165	ENSDARG00000057699	styx	intron	1
chr17	ENSDART00000136059	ENSDARG00000060113	znf395a	intron	1
chr17	ENSDART00000080129	ENSDARG00000057452	STON2	intron	1
chr17	ENSDART00000090447	ENSDARG00000062501	hhipl1	intron	1
chr17	ENSDART00000144894	ENSDARG00000062510	bcl11ba	intron	1
chr17	ENSDART00000144894	ENSDARG00000062510	bcl11ba	intron	1
chr17	ENSDART00000104874	ENSDARG00000071082	p4ha1b	intron	1
chr17	ENSDART00000104874	ENSDARG00000071082	p4ha1b	intron	1
chr17	ENSDART00000114236	ENSDARG00000077349	SORCS3 (2 of 2)	intron	1
chr17	ENSDART00000149481	ENSDARG00000061736	ank3a	intron	1
chr17	ENSDART00000149481	ENSDARG00000061736	ank3a	intron	1
chr17	ENSDART00000149481	ENSDARG00000061736	ank3a	intron	1
chr17	ENSDART00000113655	ENSDARG00000077979	TMEM26 (1 of 2)	intron	1
chr17	ENSDART00000113655	ENSDARG00000077979	TMEM26 (1 of 2)	intron	1
chr17	ENSDART00000007021	ENSDARG00000013443	atp6v1ba	intron	1
chr17	ENSDART00000063772	ENSDARG00000007918	ttc27	intron	1
chr17	ENSDART00000034913	ENSDARG00000057053	SGMS1 (2 of 2)	intron	1
chr17	ENSDART00000122108	ENSDARG00000088699	PDZD8	intron	1
chr17	ENSDART00000135148	ENSDARG00000092649	mdh1b	intron	1
chr17	ENSDART00000092941	ENSDARG00000063553	rlf	intron	1
chr17	ENSDART00000092941	ENSDARG00000063553	rlf	intron	1
chr17	ENSDART00000092941	ENSDARG00000063553	rlf	intron	1
chr17	ENSDART00000093004	ENSDARG00000071357	MAP4K3 (1 of 2)	intron	1
chr17	ENSDART00000146309	ENSDARG00000044102	znf593	intron	1
chr17	ENSDART00000027957	ENSDARG00000021220	hmgcl	intron	1
chr17	ENSDART00000115335	ENSDARG00000078130	ERICH1	intron	1
chr17	ENSDART00000109582	ENSDARG00000075898	SPATA7	intron	1
chr17	ENSDART00000030691	ENSDARG00000022995	clic4	intron	1
chr17	ENSDART00000023470	ENSDARG00000030237	pgrmc2	intron	1
chr17	ENSDART00000130080	ENSDARG00000021896	asap3	intron	1
chr17	ENSDART00000110903	ENSDARG00000079233	E2F2	intron	1
chr17	ENSDART00000110903	ENSDARG00000079233	E2F2	intron	1
chr17	ENSDART00000125640	ENSDARG00000044462	qk	intron	1
chr17	ENSDART00000109693	ENSDARG00000023999	heatr5a	intron	1
chr17	ENSDART00000076344	ENSDARG00000054213	hectd1	intron	1
chr17	ENSDART00000126967	ENSDARG00000001729	strn3	intron	1
chr17	ENSDART00000076611	ENSDARG00000070791	undef	intron	1
chr17	ENSDART00000076611	ENSDARG00000070791	undef	intron	1
chr17	ENSDART00000076611	ENSDARG00000070791	undef	intron	1
chr17	ENSDART00000076611	ENSDARG00000070791	undef	intron	1
chr17	ENSDART00000076611	ENSDARG00000070791	undef	intron	1
chr17	ENSDART00000062811	ENSDARG00000042796	yy1a	intron	1
chr17	ENSDART00000126414	ENSDARG00000042840	eml1	intron	1
chr17	ENSDART00000126414	ENSDARG00000042840	eml1	intron	1
chr17	ENSDART00000136199	ENSDARG00000036775	C17H14orf126	intron	1
chr17	ENSDART00000145487	ENSDARG00000013794	klf11b	intron	1
chr17	ENSDART00000087565	ENSDARG00000061405	fam176a	intron	1
chr17	ENSDART00000123114	ENSDARG00000070916	dnajc27	intron	1
chr17	ENSDART00000135218	ENSDARG00000022983	ccdc28a	intron	1
chr17	ENSDART00000132294	ENSDARG00000015449	fut8	intron	1
chr17	ENSDART00000132294	ENSDARG00000015449	fut8	intron	1
chr17	ENSDART00000026152	ENSDARG00000010181	asap2a	intron	1
chr17	ENSDART00000025019	ENSDARG00000013266	colec11	intron	1
chr17	ENSDART00000045583	ENSDARG00000007198	MTA1	intron	1
chr17	ENSDART00000085218	ENSDARG00000060459	LRFN2 (2 of 2)	intron	1
chr17	ENSDART00000114523	ENSDARG00000077805	JMJD1C (2 of 2)	intron	1
chr17	ENSDART00000121550	ENSDARG00000032802	ktn1	intron	1
chr17	ENSDART00000049503	ENSDARG00000029045	peli2	intron	1
chr17	ENSDART00000010975	ENSDARG00000012271	tmem206	intron	1
chr17	ENSDART00000058707	ENSDARG00000040137	JDP2 (1 of 2)	intron	1
chr17	ENSDART00000075150	ENSDARG00000019995	bmp4	intron	1
chr17	ENSDART00000085996	ENSDARG00000020242	fermt2	intron	1
chr17	ENSDART00000085996	ENSDARG00000020242	fermt2	intron	1
chr17	ENSDART00000150089	ENSDARG00000004870	psen1	intron	1
chr17	ENSDART00000103350	ENSDARG00000027279	numb	intron	1
chr17	ENSDART00000109891	ENSDARG00000077567	ANGEL1 (1 of 2)	intron	1
chr17	ENSDART00000129114	ENSDARG00000091279	MEIS2 (1 of 2)	intron	1
chr17	ENSDART00000065665	ENSDARG00000044689	ttc8	intron	1
chr17	ENSDART00000114369	ENSDARG00000078445	asb2b	intron	1
chr17	ENSDART00000114369	ENSDARG00000078445	asb2b	intron	1
chr17	ENSDART00000082084	ENSDARG00000075953	DDX24	intron	1
chr17	ENSDART00000017244	ENSDARG00000020443	XKR6 (1 of 2)	intron	1
chr17	ENSDART00000022010	ENSDARG00000018773	HIVEP2 (2 of 2)	intron	1
chr17	ENSDART00000128341	ENSDARG00000091792	BX088649.1	intron	1
chr17	ENSDART00000055136	ENSDARG00000037840	actc1b	intron	1
chr17	ENSDART00000081651	ENSDARG00000058760	CDC42BPA (1 of 2)	intron	1
chr17	ENSDART00000148827	ENSDARG00000044062	ctbp2	intron	1
chr17	ENSDART00000109573	ENSDARG00000077295	akap6	intron	1
chr17	ENSDART00000007777	ENSDARG00000079182	NPAS3	intron	1
chr17	ENSDART00000150063	ENSDARG00000032553	egln3	intron	1
chr2	ENSDART00000149584	ENSDARG00000003375	gng12a	intron	1
chr2	ENSDART00000149584	ENSDARG00000003375	gng12a	intron	1
chr2	ENSDART00000081058	ENSDARG00000058229	acot11a	intron	1
chr2	ENSDART00000121888	ENSDARG00000003025	ANGPTL1 (2 of 2)	intron	1
chr2	ENSDART00000126118	ENSDARG00000089225	trove2	intron	1
chr2	ENSDART00000037848	ENSDARG00000024744	dpp6b	intron	1
chr2	ENSDART00000037848	ENSDARG00000024744	dpp6b	intron	1
chr2	ENSDART00000058484	ENSDARG00000029856	cnn3b	intron	1
chr2	ENSDART00000058484	ENSDARG00000029856	cnn3b	intron	1
chr2	ENSDART00000058484	ENSDARG00000029856	cnn3b	intron	1
chr2	ENSDART00000105742	ENSDARG00000073713	ntng1b	intron	1
chr2	ENSDART00000105742	ENSDARG00000073713	ntng1b	intron	1
chr2	ENSDART00000112131	ENSDARG00000079671	lppr4a	intron	1
chr2	ENSDART00000129354	ENSDARG00000069423	tmie	intron	1
chr2	ENSDART00000021168	ENSDARG00000005593	RXRG (2 of 2)	intron	1
chr2	ENSDART00000021168	ENSDARG00000005593	RXRG (2 of 2)	intron	1
chr2	ENSDART00000147809	ENSDARG00000093951	si:ch211-279l9.7	intron	1
chr2	ENSDART00000147809	ENSDARG00000093951	si:ch211-279l9.7	intron	1
chr2	ENSDART00000147809	ENSDARG00000093951	si:ch211-279l9.7	intron	1
chr2	ENSDART00000027587	ENSDARG00000016253	RALA (1 of 2)	intron	1
chr2	ENSDART00000027587	ENSDARG00000016253	RALA (1 of 2)	intron	1
chr2	ENSDART00000135230	ENSDARG00000075211	chd7	intron	1
chr2	ENSDART00000135230	ENSDARG00000075211	chd7	intron	1
chr2	ENSDART00000135230	ENSDARG00000075211	chd7	intron	1
chr2	ENSDART00000135230	ENSDARG00000075211	chd7	intron	1
chr2	ENSDART00000044371	ENSDARG00000032317	tox	intron	1
chr2	ENSDART00000044371	ENSDARG00000032317	tox	intron	1
chr2	ENSDART00000042255	ENSDARG00000031343	rab6bb	intron	1
chr2	ENSDART00000027782	ENSDARG00000011373	mknk2a	intron	1
chr2	ENSDART00000099690	ENSDARG00000023053	fam129ab	intron	1
chr2	ENSDART00000131630	ENSDARG00000068920	znf644a	intron	1
chr2	ENSDART00000135803	ENSDARG00000094315	si:dkeyp-99c4.2	intron	1
chr2	ENSDART00000109073	ENSDARG00000076426	FP236168.1	intron	1
chr2	ENSDART00000131030	ENSDARG00000003068	gorasp1	intron	1
chr2	ENSDART00000041877	ENSDARG00000031426	csrnp1a	intron	1
chr2	ENSDART00000078866	ENSDARG00000056378	ifi30	intron	1
chr2	ENSDART00000142601	ENSDARG00000061205	stag1a	intron	1
chr2	ENSDART00000141490	ENSDARG00000093848	si:dkey-5n7.1	intron	1
chr2	ENSDART00000141490	ENSDARG00000093848	si:dkey-5n7.1	intron	1
chr2	ENSDART00000134136	ENSDARG00000078179	fndc3ba	intron	1
chr2	ENSDART00000058111	ENSDARG00000005364	grin3b	intron	1
chr2	ENSDART00000134685	ENSDARG00000038898	zgc:113691	intron	1
chr2	ENSDART00000132651	ENSDARG00000061490	u2surp	intron	1
chr2	ENSDART00000112873	ENSDARG00000078267	si:dkey-181m9.8	intron	1
chr2	ENSDART00000137053	ENSDARG00000038894	tmx3	intron	1
chr2	ENSDART00000078305	ENSDARG00000055900	zswim5	intron	1
chr2	ENSDART00000078305	ENSDARG00000055900	zswim5	intron	1
chr2	ENSDART00000138733	ENSDARG00000078226	CDH12 (1 of 2)	intron	1
chr2	ENSDART00000141669	ENSDARG00000025326	myl12.2	intron	1
chr2	ENSDART00000141170	ENSDARG00000002127	stam	intron	1
chr2	ENSDART00000049219	ENSDARG00000055565	cacnb2b	intron	1
chr2	ENSDART00000049219	ENSDARG00000055565	cacnb2b	intron	1
chr2	ENSDART00000111810	ENSDARG00000075706	si:ch211-106h4.9	intron	1
chr2	ENSDART00000140776	ENSDARG00000091946	si:ch211-139k8.2	intron	1
chr2	ENSDART00000140776	ENSDARG00000091946	si:ch211-139k8.2	intron	1
chr2	ENSDART00000140776	ENSDARG00000091946	si:ch211-139k8.2	intron	1
chr2	ENSDART00000041319	ENSDARG00000028173	slc4a2a	intron	1
chr2	ENSDART00000041319	ENSDARG00000028173	slc4a2a	intron	1
chr2	ENSDART00000041146	ENSDARG00000032951	nrbp2	intron	1
chr2	ENSDART00000019762	ENSDARG00000008784	prpf4ba	intron	1
chr2	ENSDART00000134651	ENSDARG00000060929	rnf220a	intron	1
chr2	ENSDART00000134651	ENSDARG00000060929	rnf220a	intron	1
chr2	ENSDART00000134651	ENSDARG00000060929	rnf220a	intron	1
chr2	ENSDART00000134651	ENSDARG00000060929	rnf220a	intron	1
chr2	ENSDART00000126135	ENSDARG00000018534	slc6a9	intron	1
chr2	ENSDART00000081729	ENSDARG00000058787	tmtopsa	intron	1
chr2	ENSDART00000077304	ENSDARG00000055026	ptch2	intron	1
chr2	ENSDART00000124032	ENSDARG00000087421	SERBP1 (3 of 3)	intron	1
chr2	ENSDART00000015827	ENSDARG00000020771	tnr	intron	1
chr2	ENSDART00000135843	ENSDARG00000011326	ankrd45	intron	1
chr2	ENSDART00000135843	ENSDARG00000011326	ankrd45	intron	1
chr2	ENSDART00000135843	ENSDARG00000011326	ankrd45	intron	1
chr2	ENSDART00000135843	ENSDARG00000011326	ankrd45	intron	1
chr2	ENSDART00000135843	ENSDARG00000011326	ankrd45	intron	1
chr2	ENSDART00000135843	ENSDARG00000011326	ankrd45	intron	1
chr2	ENSDART00000113489	ENSDARG00000036257	rasal2	intron	1
chr2	ENSDART00000113489	ENSDARG00000036257	rasal2	intron	1
chr2	ENSDART00000004277	ENSDARG00000036279	lamc1	intron	1
chr2	ENSDART00000004277	ENSDARG00000036279	lamc1	intron	1
chr2	ENSDART00000004277	ENSDARG00000036279	lamc1	intron	1
chr2	ENSDART00000004277	ENSDARG00000036279	lamc1	intron	1
chr2	ENSDART00000004899	ENSDARG00000012140	ccnl1b	intron	1
chr2	ENSDART00000135624	ENSDARG00000077470	FAM163A (1 of 2)	intron	1
chr2	ENSDART00000020135	ENSDARG00000004891	pex19	intron	1
chr2	ENSDART00000048277	ENSDARG00000004173	copa	intron	1
chr2	ENSDART00000025841	ENSDARG00000011157	arhgef18a	intron	1
chr2	ENSDART00000034512	ENSDARG00000068215	SDR39U1	intron	1
chr2	ENSDART00000143634	ENSDARG00000079134	mettl17	intron	1
chr2	ENSDART00000143203	ENSDARG00000079202	parp2	intron	1
chr2	ENSDART00000098529	ENSDARG00000068220	hbl3	intron	1
chr2	ENSDART00000144868	ENSDARG00000053810	hnrnpc	intron	1
chr2	ENSDART00000141614	ENSDARG00000054292	C2H14orf119	intron	1
chr2	ENSDART00000141614	ENSDARG00000054292	C2H14orf119	intron	1
chr2	ENSDART00000141614	ENSDARG00000054292	C2H14orf119	intron	1
chr2	ENSDART00000085675	ENSDARG00000060637	clstn2	intron	1
chr2	ENSDART00000105387	ENSDARG00000058995	JMJD4	intron	1
chr2	ENSDART00000147821	ENSDARG00000016084	spsb4a	intron	1
chr2	ENSDART00000136526	ENSDARG00000094509	si:ch211-16k18.1	intron	1
chr2	ENSDART00000110942	ENSDARG00000089305	CABZ01046038.1	intron	1
chr2	ENSDART00000136906	ENSDARG00000013847	egfra	intron	1
chr2	ENSDART00000008268	ENSDARG00000008858	cyp7c1	intron	1
chr2	ENSDART00000146493	ENSDARG00000016788	zeb1a	intron	1
chr2	ENSDART00000146493	ENSDARG00000016788	zeb1a	intron	1
chr2	ENSDART00000146493	ENSDARG00000016788	zeb1a	intron	1
chr2	ENSDART00000146804	ENSDARG00000056998	kirrelb	intron	1
chr2	ENSDART00000084174	ENSDARG00000060041	LIG1	intron	1
chr2	ENSDART00000018818	ENSDARG00000021398	mul1a	intron	1
chr2	ENSDART00000128457	ENSDARG00000076757	EPHB1	intron	1
chr2	ENSDART00000098061	ENSDARG00000052978	mbnl1	intron	1
chr2	ENSDART00000056277	ENSDARG00000009735	gigfy2	intron	1
chr2	ENSDART00000056277	ENSDARG00000009735	gigfy2	intron	1
chr2	ENSDART00000061429	ENSDARG00000029925	dlg1l	intron	1
chr2	ENSDART00000083710	ENSDARG00000059866	CACTIN	intron	1
chr2	ENSDART00000142835	ENSDARG00000004291	hecw1	intron	1
chr2	ENSDART00000138530	ENSDARG00000059795	THEM6 (2 of 2)	intron	1
chr2	ENSDART00000144384	ENSDARG00000008109	eef1da	intron	1
chr2	ENSDART00000146418	ENSDARG00000094243	shda	intron	1
chr2	ENSDART00000044411	ENSDARG00000053326	gna11b	intron	1
chr2	ENSDART00000024629	ENSDARG00000020128	RAB31	intron	1
chr2	ENSDART00000027313	ENSDARG00000013044	ndufv2	intron	1
chr2	ENSDART00000074270	ENSDARG00000052419	ankrd12	intron	1
chr2	ENSDART00000074270	ENSDARG00000052419	ankrd12	intron	1
chr2	ENSDART00000021011	ENSDARG00000016302	upf1	intron	1
chr2	ENSDART00000085917	ENSDARG00000060750	BTBD2 (1 of 2)	intron	1
chr2	ENSDART00000037698	ENSDARG00000022213	uck2b	intron	1
chr2	ENSDART00000037698	ENSDARG00000022213	uck2b	intron	1
chr2	ENSDART00000125533	ENSDARG00000086541	CABZ01100278.1	intron	1
chr2	ENSDART00000142735	ENSDARG00000093342	si:ch211-13f8.1	intron	1
chr2	ENSDART00000124757	ENSDARG00000089125	CABZ01064012.1	intron	1
chr2	ENSDART00000146547	ENSDARG00000078299	GLT25D2 (2 of 2)	intron	1
chr2	ENSDART00000127890	ENSDARG00000086333	CABZ01084952.1	intron	1
chr2	ENSDART00000130781	ENSDARG00000016477	eif4a2	intron	1
chr2	ENSDART00000124757	ENSDARG00000089125	CABZ01064012.1	intron	1
chr2	ENSDART00000040111	ENSDARG00000008450	pcolce2a	intron	1
chr2	ENSDART00000081442	ENSDARG00000029248	fubp1	intron	1
chr2	ENSDART00000131613	ENSDARG00000029292	C2H1orf21	intron	1
chr22	ENSDART00000081420	ENSDARG00000076721	zgc:171686	intron	1
chr22	ENSDART00000142012	ENSDARG00000031954	rbck1	intron	1
chr22	ENSDART00000133244	ENSDARG00000043095	kctd6a	intron	1
chr22	ENSDART00000013933	ENSDARG00000008049	si:dkey-42i9.4	intron	1
chr22	ENSDART00000105849	ENSDARG00000013681	SHISA5 (1 of 2)	intron	1
chr22	ENSDART00000105846	ENSDARG00000071541	si:dkey-42i9.8	intron	1
chr22	ENSDART00000010991	ENSDARG00000042308	arhgef18b	intron	1
chr22	ENSDART00000010991	ENSDARG00000042308	arhgef18b	intron	1
chr22	ENSDART00000105823	ENSDARG00000071524	insrb	intron	1
chr22	ENSDART00000105823	ENSDARG00000071524	insrb	intron	1
chr22	ENSDART00000105823	ENSDARG00000071524	insrb	intron	1
chr22	ENSDART00000047442	ENSDARG00000017798	bcor	intron	1
chr22	ENSDART00000002691	ENSDARG00000008407	tspan7b	intron	1
chr22	ENSDART00000137537	ENSDARG00000043006	gnav1	intron	1
chr22	ENSDART00000109596	ENSDARG00000079420	dpp4	intron	1
chr22	ENSDART00000015199	ENSDARG00000013012	rpl36	intron	1
chr22	ENSDART00000106143	ENSDARG00000071674	lonp1	intron	1
chr22	ENSDART00000106436	ENSDARG00000071790	zgc:171318	intron	1
chr22	ENSDART00000063029	ENSDARG00000032318	mfsd6a	intron	1
chr22	ENSDART00000106540	ENSDARG00000074125	si:dkey-4c15.5	intron	1
chr22	ENSDART00000106540	ENSDARG00000074125	si:dkey-4c15.5	intron	1
chr22	ENSDART00000106540	ENSDARG00000074125	si:dkey-4c15.5	intron	1
chr22	ENSDART00000106540	ENSDARG00000074125	si:dkey-4c15.5	intron	1
chr22	ENSDART00000105711	ENSDARG00000020000	sh3bp4a	intron	1
chr22	ENSDART00000106540	ENSDARG00000074125	si:dkey-4c15.5	intron	1
chr22	ENSDART00000143366	ENSDARG00000092088	si:dkey-4c15.8	intron	1
chr22	ENSDART00000004416	ENSDARG00000004789	lrp1ba	intron	1
chr22	ENSDART00000106235	ENSDARG00000094410	si:dkey-4c15.14	intron	1
chr22	ENSDART00000106235	ENSDARG00000094410	si:dkey-4c15.14	intron	1
chr22	ENSDART00000106235	ENSDARG00000094410	si:dkey-4c15.14	intron	1
chr22	ENSDART00000106235	ENSDARG00000094410	si:dkey-4c15.14	intron	1
chr22	ENSDART00000144545	ENSDARG00000062550	rc3h1	intron	1
chr22	ENSDART00000106329	ENSDARG00000077078	si:ch73-92e7.2	intron	1
chr22	ENSDART00000106329	ENSDARG00000077078	si:ch73-92e7.2	intron	1
chr22	ENSDART00000106329	ENSDARG00000077078	si:ch73-92e7.2	intron	1
chr22	ENSDART00000062727	ENSDARG00000042742	stx6	intron	1
chr22	ENSDART00000106329	ENSDARG00000077078	si:ch73-92e7.2	intron	1
chr22	ENSDART00000106329	ENSDARG00000077078	si:ch73-92e7.2	intron	1
chr22	ENSDART00000106329	ENSDARG00000077078	si:ch73-92e7.2	intron	1
chr22	ENSDART00000135604	ENSDARG00000062402	frem1b	intron	1
chr22	ENSDART00000106329	ENSDARG00000077078	si:ch73-92e7.2	intron	1
chr22	ENSDART00000106329	ENSDARG00000077078	si:ch73-92e7.2	intron	1
chr22	ENSDART00000003091	ENSDARG00000088231	CELSR2 (1 of 2)	intron	1
chr22	ENSDART00000144031	ENSDARG00000068478	gpx4a	intron	1
chr22	ENSDART00000138483	ENSDARG00000095174	si:ch73-243b8.4	intron	1
chr22	ENSDART00000105432	ENSDARG00000071339	mef2bnb	intron	1
chr22	ENSDART00000137985	ENSDARG00000006192	gatad2ab	intron	1
chr22	ENSDART00000033103	ENSDARG00000006192	gatad2ab	intron	1
chr22	ENSDART00000033103	ENSDARG00000006192	gatad2ab	intron	1
chr22	ENSDART00000033103	ENSDARG00000006192	gatad2ab	intron	1
chr22	ENSDART00000042770	ENSDARG00000022905	si:dkey-20i20.12	intron	1
chr22	ENSDART00000106221	ENSDARG00000071719	si:dkey-20i20.2	intron	1
chr22	ENSDART00000074228	ENSDARG00000052383	TCF3 (1 of 2)	intron	1
chr22	ENSDART00000089015	ENSDARG00000039899	zbtb7a	intron	1
chr22	ENSDART00000133982	ENSDARG00000056483	ssbp4	intron	1
chr22	ENSDART00000133982	ENSDARG00000056483	ssbp4	intron	1
chr22	ENSDART00000131743	ENSDARG00000073867	C22H19orf60	intron	1
chr22	ENSDART00000089408	ENSDARG00000062109	shdb	intron	1
chr22	ENSDART00000149635	ENSDARG00000008767	si:dkey-42p8.3	intron	1
chr22	ENSDART00000113824	ENSDARG00000019530	hdgfrp2	intron	1
chr22	ENSDART00000105597	ENSDARG00000024775	si:ch211-129c21.1	intron	1
chr22	ENSDART00000126795	ENSDARG00000071442	aspm	intron	1
chr22	ENSDART00000089774	ENSDARG00000062245	crb1	intron	1
chr22	ENSDART00000139258	ENSDARG00000095269	si:ch73-138e16.4	intron	1
chr22	ENSDART00000142151	ENSDARG00000074789	si:ch73-138e16.6	intron	1
chr22	ENSDART00000063571	ENSDARG00000043302	zgc:112958	intron	1
chr22	ENSDART00000112826	ENSDARG00000074264	TMEM186	intron	1
chr22	ENSDART00000135310	ENSDARG00000094566	si:dkey-44g23.10	intron	1
chr22	ENSDART00000142165	ENSDARG00000092128	si:dkey-1b17.2	intron	1
chr22	ENSDART00000143012	ENSDARG00000087886	si:dkey-15h8.13	intron	1
chr22	ENSDART00000059820	ENSDARG00000040812	ncf4	intron	1
chr22	ENSDART00000135503	ENSDARG00000092881	si:ch211-223c9.2	intron	1
chr22	ENSDART00000125779	ENSDARG00000091387	wu:fi13g07	intron	1
chr22	ENSDART00000075049	ENSDARG00000053074	GIPC3	intron	1
chr22	ENSDART00000059997	ENSDARG00000040938	C22H3orf32	intron	1
chr22	ENSDART00000024756	ENSDARG00000054827	zgc:162724	intron	1
chr22	ENSDART00000092447	ENSDARG00000027618	grip2b	intron	1
chr22	ENSDART00000092447	ENSDARG00000027618	grip2b	intron	1
chr22	ENSDART00000092447	ENSDARG00000027618	grip2b	intron	1
chr22	ENSDART00000104693	ENSDARG00000024276	PCBP4	intron	1
chr22	ENSDART00000104693	ENSDARG00000024276	PCBP4	intron	1
chr22	ENSDART00000104693	ENSDARG00000024276	PCBP4	intron	1
chr22	ENSDART00000112234	ENSDARG00000078752	si:ch1073-280h16.1	intron	1
chr22	ENSDART00000036283	ENSDARG00000022271	trim35-34	intron	1
chr22	ENSDART00000104478	ENSDARG00000022968	fxr1	intron	1
chr22	ENSDART00000104478	ENSDARG00000022968	fxr1	intron	1
chr22	ENSDART00000128064	ENSDARG00000087080	CABZ01044356.1	intron	1
chr22	ENSDART00000085931	ENSDARG00000060783	ACAP2 (1 of 2)	intron	1
chr22	ENSDART00000015103	ENSDARG00000015749	hps3	intron	1
chr22	ENSDART00000015103	ENSDARG00000015749	hps3	intron	1
chr22	ENSDART00000098461	ENSDARG00000011863	PTK7	intron	1
chr22	ENSDART00000098461	ENSDARG00000011863	PTK7	intron	1
chr22	ENSDART00000125302	ENSDARG00000087398	CR751224.2	intron	1
chr22	ENSDART00000012686	ENSDARG00000015123	zgc:101000	intron	1
chr22	ENSDART00000145983	ENSDARG00000076554	cdkn1a	intron	1
chr22	ENSDART00000145983	ENSDARG00000076554	cdkn1a	intron	1
chr22	ENSDART00000145983	ENSDARG00000076554	cdkn1a	intron	1
chr22	ENSDART00000144309	ENSDARG00000059360	srsf3b	intron	1
chr22	ENSDART00000145305	ENSDARG00000058794	si:dkey-19a16.2	intron	1
chr22	ENSDART00000126044	ENSDARG00000090612	CT583625.2	intron	1
chr22	ENSDART00000126044	ENSDARG00000090612	CT583625.2	intron	1
chr22	ENSDART00000126044	ENSDARG00000090612	CT583625.2	intron	1
chr22	ENSDART00000126044	ENSDARG00000090612	CT583625.2	intron	1
chr22	ENSDART00000126044	ENSDARG00000090612	CT583625.2	intron	1
chr22	ENSDART00000126044	ENSDARG00000090612	CT583625.2	intron	1
chr22	ENSDART00000124219	ENSDARG00000090869	CABZ01010194.2	intron	1
chr22	ENSDART00000124219	ENSDARG00000090869	CABZ01010194.2	intron	1
chr22	ENSDART00000124219	ENSDARG00000090869	CABZ01010194.2	intron	1
chr22	ENSDART00000136636	ENSDARG00000075027	fgfr1bl	intron	1
chr22	ENSDART00000114586	ENSDARG00000091230	CABZ01077223.1	intron	1
chr22	ENSDART00000097196	ENSDARG00000009361	CABZ01077220.1	intron	1
chr22	ENSDART00000140720	ENSDARG00000052680	si:dkey-182g1.2	intron	1
chr22	ENSDART00000106033	ENSDARG00000090600	si:ch211-213a13.1	intron	1
chr22	ENSDART00000149743	ENSDARG00000044525	pparda	intron	1
chr1	ENSDART00000003317	ENSDARG00000016304	tfdp1b	intron	1
chr1	ENSDART00000055566	ENSDARG00000038114	xpa	intron	1
chr1	ENSDART00000021693	ENSDARG00000009026	ANK2	intron	1
chr1	ENSDART00000021693	ENSDARG00000009026	ANK2	intron	1
chr1	ENSDART00000005067	ENSDARG00000003398	rbpja	intron	1
chr1	ENSDART00000109970	ENSDARG00000079317	DLC1	intron	1
chr1	ENSDART00000109970	ENSDARG00000079317	DLC1	intron	1
chr1	ENSDART00000109970	ENSDARG00000079317	DLC1	intron	1
chr1	ENSDART00000130418	ENSDARG00000090659	SGCZ	intron	1
chr1	ENSDART00000081047	ENSDARG00000002791	atp1a1	intron	1
chr1	ENSDART00000039917	ENSDARG00000030514	acsl1	intron	1
chr1	ENSDART00000122187	ENSDARG00000089477	si:ch211-132g1.3	intron	1
chr1	ENSDART00000082063	ENSDARG00000008287	fam114a1	intron	1
chr1	ENSDART00000014916	ENSDARG00000015495	klf3	intron	1
chr1	ENSDART00000145102	ENSDARG00000092811	si:dkey-167i21.4	intron	1
chr1	ENSDART00000145102	ENSDARG00000092811	si:dkey-167i21.4	intron	1
chr1	ENSDART00000146410	ENSDARG00000079488	zgc:195282	intron	1
chr1	ENSDART00000114514	ENSDARG00000073902	ptpn9b	intron	1
chr1	ENSDART00000133959	ENSDARG00000003631	clock3	intron	1
chr1	ENSDART00000148219	ENSDARG00000094729	si:ch211-42i9.4	intron	1
chr1	ENSDART00000143303	ENSDARG00000095388	si:ch211-42i9.5	intron	1
chr1	ENSDART00000128187	ENSDARG00000018460	mbnl2	intron	1
chr1	ENSDART00000058877	ENSDARG00000040246	RAP2A (2 of 2)	intron	1
chr1	ENSDART00000058876	ENSDARG00000040245	kpnb3	intron	1
chr1	ENSDART00000129066	ENSDARG00000055443	zcchc7	intron	1
chr1	ENSDART00000129066	ENSDARG00000055443	zcchc7	intron	1
chr1	ENSDART00000047728	ENSDARG00000030759	melk	intron	1
chr1	ENSDART00000134576	ENSDARG00000092290	GSG2	intron	1
chr1	ENSDART00000145942	ENSDARG00000055099	fam184b	intron	1
chr1	ENSDART00000145942	ENSDARG00000055099	fam184b	intron	1
chr1	ENSDART00000098627	ENSDARG00000068261	pros1	intron	1
chr1	ENSDART00000086512	ENSDARG00000060994	fbxw7	intron	1
chr1	ENSDART00000132355	ENSDARG00000093590	si:dkey-104e13.1	intron	1
chr1	ENSDART00000141648	ENSDARG00000074451	mnd1	intron	1
chr1	ENSDART00000141648	ENSDARG00000074451	mnd1	intron	1
chr1	ENSDART00000134470	ENSDARG00000074812	fhdc1	intron	1
chr1	ENSDART00000134470	ENSDARG00000074812	fhdc1	intron	1
chr1	ENSDART00000102501	ENSDARG00000070055	arfip1	intron	1
chr1	ENSDART00000030141	ENSDARG00000021702	pdcd4a	intron	1
chr1	ENSDART00000030141	ENSDARG00000021702	pdcd4a	intron	1
chr1	ENSDART00000059264	ENSDARG00000054031	MXD4	intron	1
chr1	ENSDART00000059264	ENSDARG00000054031	MXD4	intron	1
chr1	ENSDART00000059264	ENSDARG00000054031	MXD4	intron	1
chr1	ENSDART00000102500	ENSDARG00000023330	anp32b	intron	1
chr1	ENSDART00000102500	ENSDARG00000023330	anp32b	intron	1
chr1	ENSDART00000047211	ENSDARG00000031632	chst10	intron	1
chr1	ENSDART00000148536	ENSDARG00000053456	GK	intron	1
chr1	ENSDART00000142184	ENSDARG00000037178	zic2b	intron	1
chr1	ENSDART00000142184	ENSDARG00000037178	zic2b	intron	1
chr1	ENSDART00000018827	ENSDARG00000003142	dachc	intron	1
chr1	ENSDART00000085454	ENSDARG00000060559	dis3	intron	1
chr1	ENSDART00000049151	ENSDARG00000033680	gli1	intron	1
chr1	ENSDART00000114384	ENSDARG00000079350	znf654	intron	1
chr1	ENSDART00000046094	ENSDARG00000032056	arl6	intron	1
chr1	ENSDART00000012873	ENSDARG00000015312	klf12a	intron	1
chr1	ENSDART00000033566	ENSDARG00000027199	smad1	intron	1
chr1	ENSDART00000037516	ENSDARG00000076171	znf827	intron	1
chr1	ENSDART00000114850	ENSDARG00000011299	blzf1	intron	1
chr1	ENSDART00000101489	ENSDARG00000069640	vegfc	intron	1
chr1	ENSDART00000148701	ENSDARG00000005479	odz3	intron	1
chr1	ENSDART00000148701	ENSDARG00000005479	odz3	intron	1
chr1	ENSDART00000053763	ENSDARG00000036990	dctd	intron	1
chr1	ENSDART00000035739	ENSDARG00000024828	TMEM134	intron	1
chr1	ENSDART00000139354	ENSDARG00000070162	stox2	intron	1
chr1	ENSDART00000110880	ENSDARG00000013042	ing2	intron	1
chr1	ENSDART00000110880	ENSDARG00000013042	ing2	intron	1
chr1	ENSDART00000101617	ENSDARG00000069699	aip	intron	1
chr1	ENSDART00000136849	ENSDARG00000069707	si:ch211-113e8.5	intron	1
chr1	ENSDART00000045697	ENSDARG00000031435	zgc:56493	intron	1
chr1	ENSDART00000045697	ENSDARG00000031435	zgc:56493	intron	1
chr1	ENSDART00000122059	ENSDARG00000087333	scoca	intron	1
chr1	ENSDART00000145272	ENSDARG00000033604	lrpap1	intron	1
chr1	ENSDART00000145789	ENSDARG00000078908	FBXO41	intron	1
chr1	ENSDART00000053681	ENSDARG00000036965	rnf24	intron	1
chr1	ENSDART00000053681	ENSDARG00000036965	rnf24	intron	1
chr1	ENSDART00000040204	ENSDARG00000031164	tuba8l2	intron	1
chr1	ENSDART00000081835	ENSDARG00000037748	slc43a1b	intron	1
chr1	ENSDART00000081835	ENSDARG00000037748	slc43a1b	intron	1
chr1	ENSDART00000081835	ENSDARG00000037748	slc43a1b	intron	1
chr1	ENSDART00000083127	ENSDARG00000059653	kdm2aa	intron	1
chr1	ENSDART00000145354	ENSDARG00000016835	tcirg1	intron	1
chr1	ENSDART00000134635	ENSDARG00000093997	si:dkey-9i23.15	intron	1
chr1	ENSDART00000141145	ENSDARG00000093954	si:dkey-9i23.16	intron	1
chr1	ENSDART00000141145	ENSDARG00000093954	si:dkey-9i23.16	intron	1
chr1	ENSDART00000021336	ENSDARG00000030972	dnaja1l	intron	1
chr1	ENSDART00000143664	ENSDARG00000030376	grin2bb	intron	1
chr1	ENSDART00000150165	ENSDARG00000069619	atf7ip	intron	1
chr1	ENSDART00000150165	ENSDARG00000069619	atf7ip	intron	1
chr1	ENSDART00000150165	ENSDARG00000069619	atf7ip	intron	1
chr1	ENSDART00000150165	ENSDARG00000069619	atf7ip	intron	1
chr1	ENSDART00000146101	ENSDARG00000002285	mcoln1	intron	1
chr1	ENSDART00000146101	ENSDARG00000002285	mcoln1	intron	1
chr1	ENSDART00000143363	ENSDARG00000069595	si:ch211-214c7.4	intron	1
chr1	ENSDART00000084512	ENSDARG00000060184	pkn1	intron	1
chr1	ENSDART00000140890	ENSDARG00000010773	pnpla6	intron	1
chr1	ENSDART00000143228	ENSDARG00000029133	tubgcp3	intron	1
chr1	ENSDART00000074514	ENSDARG00000052624	spryd7a	intron	1
chr1	ENSDART00000142880	ENSDARG00000092950	si:dkey-7a20.9	intron	1
chr1	ENSDART00000110573	ENSDARG00000075865	SORCS3 (1 of 2)	intron	1
chr1	ENSDART00000150386	ENSDARG00000096031	si:ch73-6k14.2	intron	1
chr1	ENSDART00000124833	ENSDARG00000052480	pdcd11	intron	1
chr1	ENSDART00000092324	ENSDARG00000063297	abcb6	intron	1
chr1	ENSDART00000084184	ENSDARG00000060036	aimp1	intron	1
chr1	ENSDART00000080389	ENSDARG00000075564	FAM13A	intron	1
chr1	ENSDART00000010449	ENSDARG00000005578	ugp2a	intron	1
chr1	ENSDART00000041265	ENSDARG00000020001	rad23aa	intron	1
chr1	ENSDART00000007079	ENSDARG00000018190	asna1	intron	1
chr1	ENSDART00000074231	ENSDARG00000052386	CLDND1 (2 of 2)	intron	1
chr1	ENSDART00000141530	ENSDARG00000004634	osbp	intron	1
chr1	ENSDART00000127325	ENSDARG00000089342	wu:fc75a09	intron	1
chr1	ENSDART00000109356	ENSDARG00000073857	klf7a	intron	1
chr1	ENSDART00000048349	ENSDARG00000031203	commd1	intron	1
chr1	ENSDART00000114689	ENSDARG00000079973	pus10	intron	1
chr1	ENSDART00000020680	ENSDARG00000010078	nup133	intron	1
chr1	ENSDART00000108601	ENSDARG00000077790	dcaf15	intron	1
chr1	ENSDART00000108601	ENSDARG00000077790	dcaf15	intron	1
chr1	ENSDART00000103696	ENSDARG00000070558	si:ch211-93g23.2	intron	1
chr1	ENSDART00000103701	ENSDARG00000025754	ube2f	intron	1
chr1	ENSDART00000038330	ENSDARG00000026489	khsrp	intron	1
chr1	ENSDART00000074058	ENSDARG00000005690	AL929150.1	intron	1
chr1	ENSDART00000132727	ENSDARG00000069249	aftpha	intron	1
chr1	ENSDART00000133915	ENSDARG00000093412	sertad2a	intron	1
chr1	ENSDART00000092118	ENSDARG00000063207	erbb4a	intron	1
chr1	ENSDART00000018758	ENSDARG00000007289	METRNL (2 of 2)	intron	1
chr1	ENSDART00000081122	ENSDARG00000058270	GLT25D1 (1 of 3)	intron	1
chr1	ENSDART00000081122	ENSDARG00000058270	GLT25D1 (1 of 3)	intron	1
chr1	ENSDART00000127718	ENSDARG00000052086	zgc:174928	intron	1
chr1	ENSDART00000100171	ENSDARG00000020270	DNM2 (2 of 2)	intron	1
chr1	ENSDART00000102399	ENSDARG00000043682	CABZ01080370.1	intron	1
chr1	ENSDART00000013264	ENSDARG00000018319	arglu1b	intron	1
chr1	ENSDART00000130658	ENSDARG00000087845	CU861653.2	intron	1
chr1	ENSDART00000113289	ENSDARG00000020489	CASKIN1 (2 of 2)	intron	1
chr1	ENSDART00000121823	ENSDARG00000025034	SYNGR3 (2 of 2)	intron	1
chr1	ENSDART00000121823	ENSDARG00000025034	SYNGR3 (2 of 2)	intron	1
chr1	ENSDART00000114613	ENSDARG00000076176	ptcd1	intron	1
chr1	ENSDART00000114613	ENSDARG00000076176	ptcd1	intron	1
chr1	ENSDART00000054987	ENSDARG00000037746	actb1	intron	1
chr1	ENSDART00000054987	ENSDARG00000037746	actb1	intron	1
chr1	ENSDART00000054987	ENSDARG00000037746	actb1	intron	1
chr1	ENSDART00000054987	ENSDARG00000037746	actb1	intron	1
chr1	ENSDART00000081343	ENSDARG00000058471	plk1	intron	1
chr1	ENSDART00000054835	ENSDARG00000037647	rnf175	intron	1
chr1	ENSDART00000110698	ENSDARG00000079452	rbm46	intron	1
chr18	ENSDART00000028938	ENSDARG00000021979	mical3a	intron	1
chr18	ENSDART00000061848	ENSDARG00000042189	si:ch211-59c24.1	intron	1
chr18	ENSDART00000138564	ENSDARG00000094024	si:dkey-101p2.2	intron	1
chr18	ENSDART00000051105	ENSDARG00000035273	TMTC2 (1 of 2)	intron	1
chr18	ENSDART00000114024	ENSDARG00000026865	fam107b	intron	1
chr18	ENSDART00000008035	ENSDARG00000010445	trabd	intron	1
chr18	ENSDART00000110262	ENSDARG00000063019	panx2	intron	1
chr18	ENSDART00000099764	ENSDARG00000068876	zgc:153031	intron	1
chr18	ENSDART00000014188	ENSDARG00000008748	ube2na	intron	1
chr18	ENSDART00000143744	ENSDARG00000041791	mgat4c	intron	1
chr18	ENSDART00000079758	ENSDARG00000057167	eif4g2b	intron	1
chr18	ENSDART00000141873	ENSDARG00000062506	zc3h18	intron	1
chr18	ENSDART00000025782	ENSDARG00000003487	nup93	intron	1
chr18	ENSDART00000025782	ENSDARG00000003487	nup93	intron	1
chr18	ENSDART00000143475	ENSDARG00000007753	cpne2	intron	1
chr18	ENSDART00000043843	ENSDARG00000030871	siah1	intron	1
chr18	ENSDART00000100458	ENSDARG00000069168	C18H15orf39	intron	1
chr18	ENSDART00000006300	ENSDARG00000016038	ptplad1	intron	1
chr18	ENSDART00000060766	ENSDARG00000041450	rab11a	intron	1
chr18	ENSDART00000060766	ENSDARG00000041450	rab11a	intron	1
chr18	ENSDART00000089549	ENSDARG00000062178	fam65a	intron	1
chr18	ENSDART00000126899	ENSDARG00000056525	bcar1	intron	1
chr18	ENSDART00000092977	ENSDARG00000063558	ARHGEF17	intron	1
chr18	ENSDART00000059961	ENSDARG00000040917	cbfb	intron	1
chr18	ENSDART00000133361	ENSDARG00000040926	nr2f2	intron	1
chr18	ENSDART00000135628	ENSDARG00000094853	si:ch211-147m20.3	intron	1
chr18	ENSDART00000112658	ENSDARG00000075769	LRCH3	intron	1
chr18	ENSDART00000112658	ENSDARG00000075769	LRCH3	intron	1
chr18	ENSDART00000074168	ENSDARG00000044479	EIF2A	intron	1
chr18	ENSDART00000148004	ENSDARG00000095451	si:ch211-196l7.4	intron	1
chr18	ENSDART00000015712	ENSDARG00000014680	znf710a	intron	1
chr18	ENSDART00000130783	ENSDARG00000063564	fam168a	intron	1
chr18	ENSDART00000060245	ENSDARG00000041108	ctsh	intron	1
chr18	ENSDART00000099423	ENSDARG00000068678	IQCG	intron	1
chr18	ENSDART00000064080	ENSDARG00000043640	cenpn	intron	1
chr18	ENSDART00000089150	ENSDARG00000062020	si:dkey-265o13.4	intron	1
chr18	ENSDART00000089150	ENSDARG00000062020	si:dkey-265o13.4	intron	1
chr18	ENSDART00000078894	ENSDARG00000056407	irf8	intron	1
chr18	ENSDART00000039495	ENSDARG00000026072	pdcd5	intron	1
chr18	ENSDART00000150608	ENSDARG00000096158	def8	intron	1
chr18	ENSDART00000131478	ENSDARG00000008140	kcnab1	intron	1
chr18	ENSDART00000088675	ENSDARG00000061841	tiparp	intron	1
chr18	ENSDART00000088673	ENSDARG00000061841	tiparp	intron	1
chr18	ENSDART00000129624	ENSDARG00000074996	tbrg1	intron	1
chr18	ENSDART00000097566	ENSDARG00000067741	itpkcb	intron	1
chr18	ENSDART00000004129	ENSDARG00000020611	C18H19orf47	intron	1
chr18	ENSDART00000098958	ENSDARG00000068421	ttc9b	intron	1
chr18	ENSDART00000098922	ENSDARG00000068406	six4.3	intron	1
chr18	ENSDART00000098922	ENSDARG00000068406	six4.3	intron	1
chr18	ENSDART00000022593	ENSDARG00000005176	zgc:101040	intron	1
chr18	ENSDART00000026767	ENSDARG00000011219	akt2	intron	1
chr18	ENSDART00000128582	ENSDARG00000061394	baz1b	intron	1
chr18	ENSDART00000138705	ENSDARG00000094317	si:dkey-208a9.1	intron	1
chr18	ENSDART00000098639	ENSDARG00000021584	cntn5	intron	1
chr18	ENSDART00000084454	ENSDARG00000052630	PVRL1 (1 of 2)	intron	1
chr18	ENSDART00000077357	ENSDARG00000055054	bcl9l	intron	1
chr18	ENSDART00000077357	ENSDARG00000055054	bcl9l	intron	1
chr18	ENSDART00000132701	ENSDARG00000094934	si:dkey-81n9.2	intron	1
chr18	ENSDART00000087339	ENSDARG00000061328	cdon	intron	1
chr18	ENSDART00000087339	ENSDARG00000061328	cdon	intron	1
chr18	ENSDART00000097328	ENSDARG00000067601	arfgap2	intron	1
chr18	ENSDART00000109948	ENSDARG00000074750	qser1	intron	1
chr18	ENSDART00000109948	ENSDARG00000074750	qser1	intron	1
chr18	ENSDART00000077341	ENSDARG00000055043	depdc7	intron	1
chr18	ENSDART00000122194	ENSDARG00000040315	pid1	intron	1
chr18	ENSDART00000027115	ENSDARG00000016080	nob1	intron	1
chr18	ENSDART00000086576	ENSDARG00000061031	DNER	intron	1
chr18	ENSDART00000123671	ENSDARG00000086919	CABZ01073963.1	intron	1
chr18	ENSDART00000113702	ENSDARG00000078458	PPP1R37 (2 of 2)	intron	1
chr18	ENSDART00000125432	ENSDARG00000015064	esrrd	intron	1
chr18	ENSDART00000125432	ENSDARG00000015064	esrrd	intron	1
chr18	ENSDART00000098419	ENSDARG00000040503	CABZ01070258.1	intron	1
chr18	ENSDART00000134984	ENSDARG00000094044	si:ch1073-221c23.4	intron	1
chr18	ENSDART00000134742	ENSDARG00000094044	si:ch1073-221c23.4	intron	1
chr18	ENSDART00000126916	ENSDARG00000012005	MOB2 (2 of 2)	intron	1
chr18	ENSDART00000007797	ENSDARG00000007180	slc30a4	intron	1
chr18	ENSDART00000142945	ENSDARG00000042933	bloc1s6	intron	1
chr18	ENSDART00000038200	ENSDARG00000026039	cyp1a	intron	1
chr18	ENSDART00000124754	ENSDARG00000089106	DDB1 (2 of 2)	intron	1
chr18	ENSDART00000009217	ENSDARG00000011072	DDX11	intron	1
chr18	ENSDART00000035869	ENSDARG00000023657	fam219b	intron	1
chr18	ENSDART00000135587	ENSDARG00000005842	cd9a	intron	1
chr18	ENSDART00000091805	ENSDARG00000062144	SHANK2	intron	1
chr18	ENSDART00000092033	ENSDARG00000063157	mapk8ip2	intron	1
chr18	ENSDART00000101161	ENSDARG00000042336	impdh1a	intron	1
chr18	ENSDART00000134224	ENSDARG00000031712	grm3	intron	1
chr18	ENSDART00000053125	ENSDARG00000036571	sema3e	intron	1
chr23	ENSDART00000111518	ENSDARG00000075821	plxnb1a	intron	1
chr23	ENSDART00000111518	ENSDARG00000075821	plxnb1a	intron	1
chr23	ENSDART00000143391	ENSDARG00000093496	si:zfos-905g2.1	intron	1
chr23	ENSDART00000112445	ENSDARG00000076292	tenc1a	intron	1
chr23	ENSDART00000129022	ENSDARG00000004843	foxp1a	intron	1
chr23	ENSDART00000112965	ENSDARG00000073757	pdzrn3a	intron	1
chr23	ENSDART00000134776	ENSDARG00000062806	ttll9	intron	1
chr23	ENSDART00000082457	ENSDARG00000059355	CABZ01074081.1	intron	1
chr23	ENSDART00000139475	ENSDARG00000094377	samd10b	intron	1
chr23	ENSDART00000104819	ENSDARG00000071055	ZNF512B	intron	1
chr23	ENSDART00000099903	ENSDARG00000078973	uckl1b	intron	1
chr23	ENSDART00000112738	ENSDARG00000078191	zbtb46	intron	1
chr23	ENSDART00000143675	ENSDARG00000093794	si:rp71-79p20.2	intron	1
chr23	ENSDART00000137410	ENSDARG00000037708	exosc10	intron	1
chr23	ENSDART00000082060	ENSDARG00000078145	si:ch211-218g4.2	intron	1
chr23	ENSDART00000042469	ENSDARG00000028894	C23H20orf20	intron	1
chr23	ENSDART00000112436	ENSDARG00000077577	NTSR1	intron	1
chr23	ENSDART00000147724	ENSDARG00000071045	si:rp71-1k13.6	intron	1
chr23	ENSDART00000142546	ENSDARG00000057869	cdc42l2	intron	1
chr23	ENSDART00000046889	ENSDARG00000057863	dnmt5	intron	1
chr23	ENSDART00000138773	ENSDARG00000094757	si:dkey-192i18.5	intron	1
chr23	ENSDART00000132543	ENSDARG00000090787	KLHDC8B	intron	1
chr23	ENSDART00000132543	ENSDARG00000090787	KLHDC8B	intron	1
chr23	ENSDART00000054691	ENSDARG00000037559	uba1	intron	1
chr23	ENSDART00000044080	ENSDARG00000032963	her12	intron	1
chr23	ENSDART00000044080	ENSDARG00000032963	her12	intron	1
chr23	ENSDART00000025487	ENSDARG00000020241	icmt	intron	1
chr23	ENSDART00000104188	ENSDARG00000056084	igsf21b	intron	1
chr23	ENSDART00000146572	ENSDARG00000094086	si:ch211-145d10.5	intron	1
chr23	ENSDART00000142474	ENSDARG00000056695	phc2a	intron	1
chr23	ENSDART00000079035	ENSDARG00000056554	rap1gap	intron	1
chr23	ENSDART00000146966	ENSDARG00000093376	si:ch211-28e16.5	intron	1
chr23	ENSDART00000142085	ENSDARG00000077353	rerea	intron	1
chr23	ENSDART00000142085	ENSDARG00000077353	rerea	intron	1
chr23	ENSDART00000122945	ENSDARG00000001754	noc2l	intron	1
chr23	ENSDART00000122945	ENSDARG00000001754	noc2l	intron	1
chr23	ENSDART00000126479	ENSDARG00000087844	plekhn1	intron	1
chr23	ENSDART00000004678	ENSDARG00000090564	PDZD4 (1 of 2)	intron	1
chr23	ENSDART00000143330	ENSDARG00000094502	si:dkey-7i1.4	intron	1
chr23	ENSDART00000088208	ENSDARG00000029146	lrp1	intron	1
chr23	ENSDART00000124963	ENSDARG00000086471	pkig	intron	1
chr23	ENSDART00000124963	ENSDARG00000086471	pkig	intron	1
chr23	ENSDART00000002939	ENSDARG00000037140	pfkfb1	intron	1
chr23	ENSDART00000002939	ENSDARG00000037140	pfkfb1	intron	1
chr23	ENSDART00000113660	ENSDARG00000076916	magi3	intron	1
chr23	ENSDART00000148212	ENSDARG00000094847	si:ch211-134d5.3	intron	1
chr23	ENSDART00000148212	ENSDARG00000094847	si:ch211-134d5.3	intron	1
chr23	ENSDART00000145332	ENSDARG00000027797	adcy6b	intron	1
chr23	ENSDART00000124482	ENSDARG00000025766	DTX3	intron	1
chr23	ENSDART00000023218	ENSDARG00000015902	stat6	intron	1
chr23	ENSDART00000027224	ENSDARG00000004745	lmbr1l	intron	1
chr23	ENSDART00000137103	ENSDARG00000037060	mll2	intron	1
chr23	ENSDART00000137103	ENSDARG00000037060	mll2	intron	1
chr23	ENSDART00000137103	ENSDARG00000037060	mll2	intron	1
chr23	ENSDART00000022045	ENSDARG00000038442	plcg1	intron	1
chr23	ENSDART00000053958	ENSDARG00000055585	c1galt1a	intron	1
chr23	ENSDART00000003548	ENSDARG00000009899	znf385a	intron	1
chr23	ENSDART00000003548	ENSDARG00000009899	znf385a	intron	1
chr23	ENSDART00000133736	ENSDARG00000093306	si:dkey-149i8.3	intron	1
chr23	ENSDART00000109304	ENSDARG00000074790	C23H20orf24	intron	1
chr23	ENSDART00000050915	ENSDARG00000037020	kif1b	intron	1
chr23	ENSDART00000078300	ENSDARG00000055893	nmnat1	intron	1
chr23	ENSDART00000133902	ENSDARG00000031720	clstn1	intron	1
chr23	ENSDART00000103841	ENSDARG00000038954	ctnnbip1	intron	1
chr23	ENSDART00000109506	ENSDARG00000077307	TMEM201	intron	1
chr23	ENSDART00000109506	ENSDARG00000077307	TMEM201	intron	1
chr23	ENSDART00000126027	ENSDARG00000053854	uts2a	intron	1
chr23	ENSDART00000138841	ENSDARG00000092307	si:ch73-287n15.1	intron	1
chr23	ENSDART00000134141	ENSDARG00000036956	ASXL1	intron	1
chr23	ENSDART00000132736	ENSDARG00000076153	lca5	intron	1
chr23	ENSDART00000053546	ENSDARG00000036878	sh3bgrl2	intron	1
chr23	ENSDART00000143425	ENSDARG00000012397	eya4	intron	1
chr23	ENSDART00000139076	ENSDARG00000036778	hbs1l	intron	1
chr23	ENSDART00000053509	ENSDARG00000036855	plagx	intron	1
chr23	ENSDART00000053509	ENSDARG00000036855	plagx	intron	1
chr23	ENSDART00000138156	ENSDARG00000000887	GTSF1	intron	1
chr23	ENSDART00000085642	ENSDARG00000060626	DGKA (1 of 2)	intron	1
chr23	ENSDART00000053472	ENSDARG00000036831	rnf41	intron	1
chr23	ENSDART00000018301	ENSDARG00000006353	itga5	intron	1
chr23	ENSDART00000018301	ENSDARG00000006353	itga5	intron	1
chr23	ENSDART00000018301	ENSDARG00000006353	itga5	intron	1
chr23	ENSDART00000027959	ENSDARG00000015460	racgap1	intron	1
chr23	ENSDART00000037501	ENSDARG00000024895	fam50a	intron	1
chr23	ENSDART00000003296	ENSDARG00000008237	sars	intron	1
chr23	ENSDART00000113643	ENSDARG00000075172	fbxo25	intron	1
chr23	ENSDART00000005158	ENSDARG00000017525	CCNT1	intron	1
chr23	ENSDART00000005158	ENSDARG00000017525	CCNT1	intron	1
chr23	ENSDART00000103169	ENSDARG00000031161	nr1d4a	intron	1
chr23	ENSDART00000132289	ENSDARG00000094148	si:dkey-148f24.5	intron	1
chr23	ENSDART00000103140	ENSDARG00000092809	hoxc9a	intron	1
chr23	ENSDART00000132273	ENSDARG00000061174	ZNF740	intron	1
chr23	ENSDART00000110478	ENSDARG00000075314	zgc:174906	intron	1
chr23	ENSDART00000086924	ENSDARG00000061161	ube2j2	intron	1
chr23	ENSDART00000065331	ENSDARG00000044485	sall4	intron	1
chr23	ENSDART00000065331	ENSDARG00000044485	sall4	intron	1
chr23	ENSDART00000124730	ENSDARG00000088925	ATP9A	intron	1
chr23	ENSDART00000136707	ENSDARG00000011809	mical1	intron	1
chr23	ENSDART00000034690	ENSDARG00000022648	otud3	intron	1
chr23	ENSDART00000110868	ENSDARG00000075468	vwa1	intron	1
chr23	ENSDART00000055099	ENSDARG00000037815	b4galt5	intron	1
chr23	ENSDART00000109567	ENSDARG00000070227	nhsa	intron	1
chr23	ENSDART00000109567	ENSDARG00000070227	nhsa	intron	1
chr23	ENSDART00000122074	ENSDARG00000026248	SLC1A7 (2 of 2)	intron	1
chr23	ENSDART00000122074	ENSDARG00000026248	SLC1A7 (2 of 2)	intron	1
chr23	ENSDART00000147434	ENSDARG00000092072	si:ch211-121b5.2	intron	1
chr23	ENSDART00000147434	ENSDARG00000092072	si:ch211-121b5.2	intron	1
chr23	ENSDART00000125273	ENSDARG00000091511	gpx7	intron	1
chr23	ENSDART00000140582	ENSDARG00000093939	si:dkey-14k21.1	intron	1
chr23	ENSDART00000141174	ENSDARG00000094487	si:dkey-65j6.3	intron	1
chr23	ENSDART00000112598	ENSDARG00000077810	otud4	intron	1
chr23	ENSDART00000097644	ENSDARG00000027112	ephb4b	intron	1
chr23	ENSDART00000097644	ENSDARG00000027112	ephb4b	intron	1
chr23	ENSDART00000014691	ENSDARG00000015835	eif4e2rs1	intron	1
chr23	ENSDART00000143399	ENSDARG00000092799	camta2	intron	1
chr23	ENSDART00000129872	ENSDARG00000036894	AIMP1 (2 of 2)	intron	1
chr23	ENSDART00000085764	ENSDARG00000076317	plod3	intron	1
chr23	ENSDART00000149930	ENSDARG00000053966	cyp17a2	intron	1
chr23	ENSDART00000149930	ENSDARG00000053966	cyp17a2	intron	1
chr23	ENSDART00000105241	ENSDARG00000058961	ntf7	intron	1
chr23	ENSDART00000128433	ENSDARG00000037846	hm13	intron	1
chr23	ENSDART00000121427	ENSDARG00000091458	KCNA2 (1 of 2)	intron	1
chr23	ENSDART00000057625	ENSDARG00000018648	lgr6	intron	1
chr23	ENSDART00000115403	ENSDARG00000078011	NAV1 (3 of 3)	intron	1
chr23	ENSDART00000114827	ENSDARG00000077371	kcnk15	intron	1
chr23	ENSDART00000092214	ENSDARG00000063230	bmp7b	intron	1
chr23	ENSDART00000081596	ENSDARG00000090952	FP102118.1	intron	1
chr23	ENSDART00000105179	ENSDARG00000071233	P4HTM (2 of 2)	intron	1
chr23	ENSDART00000026812	ENSDARG00000014500	PRPF6 (1 of 2)	intron	1
[truncated: 5,897 more rows]
